1

2

**BREVIPEDICELLUS and ERECTA mediate expression of**

3

**AtPRX17 in preventing Arabidopsis callus retardation and**

4

**browning**

5

6 Junyan Xie<sup>1</sup>, Bin Qi<sup>1</sup>, Yuanyuan Wu<sup>1,2</sup>, Chenghong Mou<sup>1,2</sup>, Lihua Wang<sup>1</sup>,

7

Yuwei Jiao<sup>1,2</sup>, Yanhui Dou<sup>1,2</sup>, Huiqiong Zheng<sup>1\*</sup>

8

9 <sup>1</sup>CAS Center for Excellence in Molecular Plant Sciences, Chinese Academy of Sciences, Shanghai,  
10 200032, China

11 <sup>2</sup> University of Chinese Academy of Sciences, Beijing 100049, China

12

13 \*Correspondence author

14 Phone: 86-21-54924243

15 Fax: 86-21-54924015

16 Email: [hqzheng@cemps.ac.cn](mailto:hqzheng@cemps.ac.cn)

17

18 The date of submission: Feb. 16, 2021

19 The numbers of figures: 9

20 The numbers of supplementary figures: 8

21 The numbers of supplementary table: 1

22

23

24 **Running title:** *BREVIPEDICELLUS* and *ERECTA* controlling expression of

25 *AtPRX17*

26 **Highlight:** *BREVIPEDICELLUS* and *ERECTA* are involved in regulating Arabidopsis  
27 callus browning by controlling expression of *AtPRX17*.

28

29 **ABSTRACT**

30 Efficient *in vitro* callus generation is fundamental to tissue culture propagation, a  
31 process required for plant regeneration and transgenic breeding for desired  
32 phenotypes. Identifying genes and regulatory elements that prevent callus retardation  
33 and browning is essential to facilitate the development of *in vitro* callus systems. Here  
34 we show that *BREVIPEDICELLUS* (*BP*) and *ERECTA* (*ER*) pathways in *Arabidopsis*  
35 callus are converged to prevent callus browning and positively regulate an  
36 isoperoxidase gene *AtPRX17* expression in the rapid growth callus. Loss of functions  
37 in both *BP* and *ER* resulted in markedly increasing callus browning. Transgenic lines  
38 with *pro35S::AtPRX17* in the *bp-5 er105* double mutant background fully rescued this  
39 phenotypic abnormality. Using plant *in vitro* DNA-binding assays, we observed that  
40 *BP* protein bound directly to the upstream sequence of *AtPRX17* to promote its  
41 transcription during callus growth. *ER* is a universally presenting factor required for  
42 cell proliferation and growth, we show that *ER* positively regulates expression of a  
43 transcription factor *WRKY6*, which also directly binds to an additional site of the  
44 *AtPRX17* promoter for its high expression. Our data reveals an important molecular  
45 mechanism in regulating expression of peroxidase isozyme to reduce Arabidopsis  
46 callus browning.

47

48 **Keywords:** *Arabidopsis thaliana*, *BREVIPEDICELLUS*, *ERECTA*, *AtPRX17*,  
49 Peroxidase isozyme, Callus browning

50

51

## 52 **Introduction**

53 Callus retardation and browning are major impediments in vitro culture of plants,  
54 resulting in decreased regenerative ability, poor growth, and even death. Oxidative  
55 stress has been considered as one of major factors in induction of callus retardation  
56 and browning. During plant tissue culture, abundant ROS could accumulate in the  
57 rapid proliferation cells because of the high metabolic rate (Cosio and Dunand, 2009;  
58 Wells et al., 2010). The accumulation of ROS not only significantly slows the further  
59 cell proliferation rate, but often causes the callus browning (Laukkanen et al., 1999).  
60 However, in the natural conditions, tissues of higher plants, such as shoot and root  
61 meristems, usually experience a long-time continued and relatively fast cell division,  
62 whereas they are barely disturbed by cell browning even if the metabolic process  
63 always produces more ROS (Hirt and Apel, 2004; Wells et al., 2010; Tsukagoshi et al.,  
64 2010; Ikeuchi et al., 2013). One possibility is that plants could possess an efficient  
65 mechanism to scavenge ROS to ensure cell proliferation at a decided rate, however,  
66 very little is known about the molecular mechanism(s) for plant to eliminate the  
67 excess ROS in both meristematic tissues *in vivo* and developing callus tissues *in vitro*.  
68 The KNOTTED1-like HOMEODOMAIN (KNOX) transcription factor  
69 BREVIPEDICELLUS (KNAT1/BP) is involved in maintaining meristem of shoot  
70 apices (Smith et al., 2002), xylem fiber development (Woerlen et al., 2017;  
71 Felipo-Benavent et al., 2018; Milhinhos et al., 2019) and fruitlet abscission (Zhao et  
72 al., 2020). Overexpression of the maize KNOTTED1 gene caused a switch from  
73 determinate to indeterminate leaf cell fates (Sinha et al., 1993). In the process of  
74 meristematic growth, the continued and rapid cell proliferation occurs in some special  
75 zones, such as the peripheral zone in shoot apical meristem and the meristem zone  
76 adjacent to the root stem cells, in which BP plays a role in part by spatially regulating  
77 boundary genes (Woerlen et al., 2017). Down-regulated expression of a peroxidase  
78 encoded by *AtPRX9GF* in *bp-9* seedlings was reported (Mele et al., 2003). In addition,  
79 BP is involved in regulating expression of *SOBIR1/EVR* gene, which acts together  
80 with *ERECTA* (Terpstra et al., 2010) to regulate programmed cell death (PCD) during  
81 xylem development in Arabidopsis shoot (Milhinhos et al., 2019). Reactive oxygen

82 species (ROS) are emerging as intracellular signaling molecules that efficiently  
83 regulate PCD during xylem development and cell proliferation in meristem in shoots  
84 and roots (Breusegen and Dat, 2006; Tsukagoshi et al., 2009). Whether BP is involved  
85 in regulation of ROS signaling remains unknown.

86 Peroxidase catalyzes the reduction of H<sub>2</sub>O<sub>2</sub> and protects tissues and cells from  
87 oxidative damage and plays important roles in controlling callus growth and browning  
88 (Brown *et al.*, 1993; Creissen *et al.*, 1994; Wakui *et al.*, 1999; Zhang *et al.*, 2020).  
89 However, apparently conflicting roles of peroxidase in the initiation of meristematic  
90 activity as well as with the suppression of growth on callus development were  
91 reported in previous studies (Basile, 1980; Goff 1975; Habib et al., 2014). An  
92 explanation on those inconsistent results is attributed to the occurrence of peroxidase  
93 in multimolecular forms, *i.e.* isoenzymes. Individual isoperoxidases may differ in  
94 their substrate specificity, pH optima, and distribution within cellular compartments,  
95 etc. (Kay et al., 1987). Specific isoperoxidases have been proven to be correlated with  
96 specific developmental events (Cosio and Dunand., 2009). Nevertheless, no specific  
97 isoperoxidase has been identified, isolated, and characterized with respect to its  
98 possible role in controlling callus growth and browning.

99 In this work, we report that a preoxidase gene *AtPRX17* plays a critical role involved  
100 in preventing callus browning. *AtPRX17* belongs to the class III peroxidase family  
101 (EC 1.11.1.7) (Tognolli et al., 2002), and we show that upregulation of *AtPRX17* is  
102 directly promoted by two types of transcription factors: one is the meristem-specific  
103 regulatory protein BP (Serikawa et al., 1996; Hay and Tsiantis, 2010), and the other is  
104 WRKY6 (Eulgem and Somssich, 2007), a transcription factor that is positively  
105 regulated by the putative receptor protein kinase ERECTA (ER).

106

## 107 **Materials and methods**

### 108 **Plant materials and culture conditions**

109 *Arabidopsis thaliana* wild-type ecotype Columbia (Col), Landsberg *erecta* (*Ler*) and  
110 Landsberg *ERECTA* (Lan), mutant *brevipedicellus* (*bp*) *bp-1* and *bp-5* (Douglas et al.,

111 2002; Qi and Zheng, 2013), *er-105* (Hord et al., 2008) and transformants *proBP::GUS*  
112 (Ori et al., 2000) and *pro 35S::BP* (Lincoln et al., 1994) have been previously  
113 described. *prx17* (SALK\_034684c) and *wrky6* (SALK\_012997c) are (T)-DNA  
114 insertion alleles in the Columbia (Col) accession and was obtained from the  
115 Arabidopsis Biological Resource Center. 3~5 mm root segments from 7-d old  
116 *Arabidopsis thaliana* seedlings were cut and transferred to callus induction medium  
117 (CIM): MS medium (Murashige and Skoog, 1962) with 3% sucrose, 2 mg/L  
118 2,4-dichlorophenoxyacetic acid, and 0.8% agar. Explants were incubated on CIM for  
119 5 weeks at 25°C under dark conditions, then calli produced from the explants was  
120 subcultured on new CIM for twice. The suspension cultures for these calli were grown  
121 as described (Zhang et al., 2015). The suspension cultures were taken as stock for  
122 repeated callus formation. The cultures were then subcultured on solid medium again  
123 and callus with a diameter of about 1mm (about 7d after subculture on the new  
124 medium) was used to monitored the growth rate by weighed the fresh weight of cells.

#### 125 **Scanning electron microscopy**

126 Samples were prepared as described by Wei et al. (2010). Briefly, calli that had been  
127 subcultured for 21 days was fixed in 3% glutaraldehyde-phosphate buffer saline  
128 fixative solution (pH 7.2) for overnight, then the samples were mounted on aluminum  
129 stubs and coated with gold in JEOL JFC-1600 after graded dehydration and  
130 replacement. The treated calli was observed with JEOL JSM-6360LV scanning  
131 electron microscope at 6kV.

#### 132 **Transmission electron microscopy**

133 Samples were prepared as described by Bestwick et al. (1997). Briefly, calli as  
134 described above was incubated in 5 mM  $\text{CeCl}_3$  in 50 mM 3-(N-morpholino)  
135 propanesulfonic acid (Mops) at pH7.2 for 1h. After treatment, samples were fixed in  
136 1.25%(v/v) glutaraldehyde and 1.25%(v/v) paraformaldehyde in 50 mM sodium  
137 cacodylate (CAB) buffer, pH7.2 for 1h and post-fixed in 1%(v/v) osmium tetroxide in  
138 CAB for 45 min. After being dehydrated through an ethanol series, samples were  
139 infiltrated and embedded in Epon 812 resin. The specimens were sectioned and the

140 thick section (0.5 $\mu$ m) were stained with 0.1% toluidine blue and examined under light  
141 microscopy (Leica DMLB). The ultra-thin sections (about 100 nm) were examined  
142 using a transmission electron microscope (Hitachi 7650 TEM) at an accelerating  
143 voltage of 75kV.

#### 144 **Diaminobenzidine oxide and nitroblue tetrazolium staining**

145 In situ detection of hydrogen peroxide was performed by staining with  
146 diaminobenzidine oxide (DAB) using an adaptation of a previous method (Daudi et  
147 al., 2012). Briefly, calli that had subcultured for 21 days was stained for 2h in 1mg/ml  
148 DAB solution containing Tween 20 (0.05% v/v) and 10 mM sodium phosphate buffer  
149 (pH7.0) in a Eppendorf tube. The staining was terminated in ethanol: glycerol: acetic  
150 acid 3:1:1(bleaching solution) placed in a water bath at 95°C for 15 min.

151 For nitroblue tetrazolium (NBT) staining, calli was stained for 15 min in a solution of  
152 2mM NBT in 20 mM phosphate buffer pH6.1. The reaction was stopped by  
153 transferring the calli in distilled water. At least six independent culture plates were  
154 used as biological replicates and three callus blocks were sampled from each culture  
155 plate.

#### 156 **TUNEL assay**

157 The calli was fixed with 4%(w/v) fresh paraformaldehyde in PBS and labeled by the  
158 TUNEL reaction mixture: the terminal deoxynucleotidyl transferase solution and the  
159 label solution described in the kit's manual. The stained cells were analyzed with a  
160 fluorescence microscope (Olympus, FV1000). The excitation and emission wave  
161 lengths were 488 nm and 515 nm, respectively.

#### 162 **Evans blue staining**

163 Cell death in calli was assayed as described by Baker and Mock (1994). Briefly, a 50  
164 mg callus was added to a mixture of 0.5 ml of 1% (w/v) Sucrose and 0.5 ml of  
165 0.5%(w/v) Evans blue solution. After 10 min, cells were drained and rinsed with  
166 deionized water, 30-40 ml, until no further blue eluted from the cells. After washing,  
167 the cells gently transferred to a 1ml plastic Eppendorf tube containing carborundum  
168 (<0.1mg). 0.5 ml of 1% aqueous SDS was added to cells to release the trapped Evans  
169 blue from the cells. The cells were ground and the homogenate diluted with 0.5 ml of

170 deionized water, centrifuged at 10,000×g for 3 min. A 0.8 ml aliquot of the  
171 supernatant was removed and the optical density determined spectrophotometrically  
172 at 600 nm.

### 173 **Peroxidase isoenzyme analysis**

174 The classical guaiacol peroxidase (class III peroxidases, E. C. 1.11.1.7) isoenzymes  
175 were analyzed as described by Naton et al. (1992). Briefly, three-week subcultured  
176 callus was homogenized on ice in 50 mM Tris-HCl buffer (pH 7.4) containing 0.58  
177 mol/L sucrose. The extracts were centrifuged (10,000 g, 20 min, 4°C) and the  
178 supernatant collected as the peroxidase fraction. For enzyme visualization, the  
179 procedures of Brewbaker et al. (1968) were modified. Peroxidases were visualized by  
180 adding 4 ml substrate solution (2% 3, 3'-diaminobenzidine tetrahydrochloride in  
181 0.1mM Tris-acetate buffer, pH 4.5) to 15.2 ml dd H<sub>2</sub>O, and starting the reaction with  
182 0.8 ml 3% H<sub>2</sub>O<sub>2</sub> (v/v). Incubation for 5~15 min at room temperature revealed  
183 greenish-brown bands on a light-yellow background.

### 184 **Reverse transcription-polymerase chain reaction analyses (RT-PCR) and** 185 **qRT-PCR**

186 Total RNA was extracted from three-week subcultured callus using an RNAiso plus  
187 Kit (TaKaRa, <http://www.takara.com.cn>) according to the manufacturer's instructions.  
188 cDNA was synthesized using 2 µg of total RNA and 100 U of ReverTra Ace reverse  
189 transcriptase (Toyobo Co., Ltd, Japan) according to the manufacturer's instructions.  
190 The products were subsequently taken to amplify the targeted genes with primers for  
191 *PRX17*; *PRX52*; *WRKY6*; *WRKY15*; *WRKY 25*; *WRKY 33* and *WRKY46*. The  
192 constitutive housekeeping gene *ADENINE PHOSPHORIBOSYL TRANSFERASE1*  
193 (*APT1*) was used as an internal control. Reactions of qRT-PCR were done in a  
194 384-well plate format with 7900HT Fast Real-time PCR System (Applied  
195 Biosystems®, <http://events-na.appliedbiosystems.com>), and SYBR Green to monitor  
196 double-stranded DNA synthesis. The *APT1* gene was used as reference for the *BP*, *ER*,  
197 *AtPRX17* and *WRKY6* genes. Experiments were conducted at least three times with  
198 equivalent results. The primers used in this study are listed in Supplemental Table S1.

199 **Screening and isolation of the Arabidopsis T-DNA insertion mutants, *prx17* and**  
200 ***wrky6***

201 For identification of homozygous insertion of *prx17* and *wrky6* mutants, respectively,  
202 segregation analysis was performed by genotyping progeny of the mutant lines  
203 containing T-DNA insertion in the *AtPRX17* gene (SALK\_034684c) or in *WRKY6*  
204 gene (SALK\_012997) in various crosses. Progeny seedlings (about 4-week-old) were  
205 genotyped by extracting DNA from a single leaf of the seedling using PCR  
206 genotyping as described by Shpak et al. (2003). RT-PCR was performed to verify  
207 knock-out of the *AtPRX17* and *WRKY6* transcript. The primers used in this study are  
208 listed in Supplemental Table S1.

209 **35S::*PRX17* transgenic plants**

210 A complementary vector consisted of CaMV35S promoter fused to the  
211 *PRX17*-encoding genomic fragment (Col-0, wild-type) was prepared according to  
212 Venglat et al. (2002). Briefly, a DNA fragment containing the full-length genomic  
213 coding region for *AtPRX17* gene was amplified by PCR using the Col-0 cDNA  
214 template and the primers: 5'-CTGCAGATGTCTTCTTCCCAT-3' and  
215 5'-GAGCTCTCAAGATACAAGCAATAC-3'. The amplified fragments were  
216 digested with *PstI* and *SacI* and inserted into the *PstI* and *SacI* sites of  
217 pMD18-T-Vector. Subsequently, the *PstI/SacI*-amplified fragment was digested by  
218 *PstI/SacI* and ligated to CaMV 35S promoter of binary vector pHB. *Agrobacterium*  
219 *tumefaciens* (GV3101) containing this recombinant construct was used to transform  
220 *bp-5 er-105* plants as described by Clough and Bent (1998). All transgenic lines used  
221 in this study are T3 homozygous plants with single copy insertion.

222 **Electrophoretic mobility shift assay (EMSA)**

223 For synthesis and purification of recombinant BP and WRKY6 proteins, cDNAs  
224 containing the full-length coding region of these two proteins were amplified by PCR.  
225 The amplified *BP* or *WRKY6* cDNA was cloned into the vector pET-30a (Novagen,  
226 www.novagen.com) by using *BamHI* and *SacI* sites. The PCR primers for the *BP* and  
227 *WRKY6* amplification were listed in Supplemental Table S1.



228 All constructs were verified by sequencing. The 6xHis-BP and 6xHis-WRKY6  
229 expression plasmid was transformed into the bacterial strain BL21 (DE3) pLysS. The  
230 transformed cells were cultured at 37°C until the OD<sub>600</sub> of the cell culture was 0.5,  
231 and then induced with 1 mM IPTG for 36 h at 12°C. For extraction of native fusion  
232 protein, the cultured bacteria cells were lysed by using a high-pressure cell crusher  
233 and the fusion proteins were purified with Ni-NTA resin (Qiagen, [www.qiagen.com](http://www.qiagen.com) )  
234 according to the manufacturer's instructions.

235 For EMSA, the complementary pairs of biotin-labeled oligonucleotides corresponding  
236 to the *AtPRX17* promoter region containing BP or WRKY6 binding sites was obtained  
237 by PCR amplification using 5'-biotin-labeled primers (Sangon Biotech, Shanghai Co.,  
238 Ltd) to generate double-stranded probes. DNA binding reactions were performed with  
239 the Light Shift Chemiluminescent EMSA Kit (Pierce, [www.piercenet.com](http://www.piercenet.com)) according  
240 to the instructions. DNA binding reactions were performed in a total volume of 20 µl  
241 of buffer (10mM Tris-HCl, pH 7.5, 2.5% Glycerol, 50mM KCl, 1mM DTT, 5mM  
242 MgCl<sub>2</sub>) containing 50ng/µL poly[dI-dC], 0.05% NP-40, 1 µg of the recombinant  
243 His-tagged BP or WRKY6 proteins and 20 fmol of probe. The binding specificity was  
244 assessed by competition with a 100- or 200-fold excess of unlabeled double-stranded  
245 oligonucleotides. Binding reaction mixtures were incubated for 30 min at 23°C and  
246 separated on native PAGE gels (5% polyacrylamide gel) in 0.5×TBE buffer, at 100V  
247 for 90 min. After electrophoresis, gels were bolted onto a positively charged nylon  
248 membrane (Amersham, now GE Healthcare, <http://www.gelifesciences.com>). The  
249 DNA was linked using a UV light cross-linker instrument equipped with 254-nm  
250 bulbs for 0.8 min exposure.

#### 251 **Transient GUS assay by agroinfiltration of *Nicotiana benthamiana***

252 *PRX17* promoter sequence was amplified with specific primers (the forward primer  
253 5'-AAGCTT TGGGACTGAATGAACTGCTGA-3' and the reverse primer 5'-  
254 GGATCCACTTTTTTCTTTTTTGGTGTG-3') by PCR from Arabidopsis genomic  
255 DNA and cloned into the transformation vector pCAMBIA1300-pBI101 at the  
256 HindIII and BamHI restriction sites, respectively as Reporter *PRX17<sub>pro</sub>::GUS*. The BP

257 full-length cDNA sequence was amplified with *BP*-specific primers (the forward  
258 primer 5'-GAATTCATGGAAGAATACCAGCATGACAACAG-3' and the reverse  
259 primer 5'-GTCGACTTATGGACCGAGACGATAAGGTCCAT-3') cloned into  
260 pC1300-N1-YFP vector at EcoRI and Sall sites as Effector 35S-BP.  
261 The *WRKY6* full-length cDNA sequence was amplified with *WRKY6*-specific primers  
262 (the forward primer 5'-GGATCCATGGACAGAGGATGGTCTGGTCTCA-3' and  
263 the reverse primer 5'-GTCGACTTGATTTTTGTGTTTCCTTCGC-3') and cloned  
264 into pC1300-N1-YFP vector at BamHI and Sall sites as Effector 35S<sub>pro</sub>::*WRKY6*.  
265 The constructs of *PRX17*<sub>pro</sub>::GUS with 35S<sub>pro</sub>::BP or 35S<sub>pro</sub>::*WRKY6*, were  
266 transformed into *Agrobacterium* (GV3101). *Agrobacteria* was infiltrated into intact  
267 leaves of *Nicotiana benthamiana* as previously described (Kane et al., 2007). After  
268 infiltration, plants were kept at 23°C for 3 days. Histochemical GUS assay was  
269 performed as previously described (Wei et al., 2010).

#### 270 **Chromatin Immunoprecipitation (ChIP)**

271 ChIP assay was performed using a method modified from the Chromatin  
272 Immunoprecipitation (ChIP) Assay Kit (Upstate , Catalog # 17-295). Callus was  
273 incubated in 1% formaldehyde for 30 min under vacuum. The cross-linking was  
274 stopped by adding glycine to a final concentration of 0.125 M. Tissues were rinsed  
275 with water and ground into a fine powder with liquid nitrogen. To extract chromatin,  
276 the powder was resuspended in SDS lysis buffer (1% SDS, 10 mM EDTA, 50 mM  
277 Tris, pH 8.1, 1 mM phenylmethylsulfonyl fluoride (PMSF)). The chromatin DNA was  
278 sonicated to reduce DNA length and diluted 1:10 in chromatin immunoprecipitation  
279 dilution buffer (0.01% SDS, 1.1% Triton X-100, 1.2 mM EDTA, 16.7 mM Tris-HCl,  
280 pH 8.1, 167 mM NaCl). The chromatin solution was precleared with Protein A  
281 agarose beads blocked with salmon sperm DNA (Upstate Biotechnology).  
282 Immunoprecipitations were performed with anti-BP antibody (sc-19215). The  
283 BP-bound chromatin was purified by incubation with Protein A agarose beads  
284 blocked with salmon sperm DNA and washing with low-salt wash buffer (0.1% SDS,  
285 1% Triton X-100, 2 mM EDTA, 20 mM Tris-HCl, pH 8.1, 150 mM NaCl), high-salt

286 wash buffer (0.1% SDS, 1% Triton X-100, 2 mM EDTA, 20 mM Tris-HCl, pH 8.1,  
287 500 mM NaCl), LiCl wash buffer (0.25 M LiCl, 1% IGEPAL-CA630, 1%  
288 deoxycholic acid (sodium salt), 1 mM EDTA, 10 mM Tris, pH 8.1), and TE buffer.  
289 The BP-bound chromatin was eluted from Protein A agarose beads with elution buffer  
290 (1% SDS, 0.1 M NaHCO<sub>3</sub>). After reversing the cross-linking by the addition of NaCl  
291 to a final concentration of 200 mM and incubation at 65°C for 4h, the DNA was  
292 purified by treating with 40 mg/mL proteinase K for 1 h, following by  
293 phenol/chloroform extraction and precipitation with DNA mate (TaKaRa). The  
294 primers used for PCR were listed in Supplemental Table S1.

295

## 296 **Results**

### 297 **Combined action of *BP* and *ER* in controlling callus growth**

298 In the wild-type (Col), root tips as explants from 7-day-old seedlings on callus  
299 induction medium (CIM) are usually able to generate the earliest callus at about 3th  
300 day after culture (DAC). The callus then undergoes a rapid growth from 10 DAC to  
301 24 DAC (Fig. 1A and E, Fig. S1A-F), accompanied by rapidly increased *BP*  
302 expression in new regeneration callus (Fig. S1G-J). The first appearance of calli from  
303 the same-age root explants of *bp-5* and *er-105* mutants as well as *bp-5 er-105* double  
304 mutant (Col background) was also at about 4 DAC and the callus grew normally as  
305 wild-type (Fig. S2). However, callus of double mutant *bp5 er105* showed significantly  
306 retarded growth rate and browning appearance after 3-4 times subculture (Fig. 1D),  
307 while *bp-5* and *er-105* callus grew normally as their wild-type (Fig. 1A, B and C) .  
308 Compared with those of Col, *bp-5*, and *er-105*, the total fresh weight produced by the  
309 *bp-5 er-105* explants was significantly reduced (Fig. 1E). In addition, we also  
310 analyzed another loss-of-function mutant of *BP* (*bp-1*), which is in the Landsberg  
311 *erecta* (*Ler*) genetic background, and similar to the *bp-5 er-105* double mutant, callus  
312 growth of *bp-1* exhibited a markedly slowed manner in comparison with calli of  
313 *bp/ER* mutant, *Ler (BP/er)* and *Lan (BP/ER)* (Fig. S3). These results indicated that *BP*  
314 and *ER* could co-regulate the growth and browning of Arabidopsis callus.

315 **Hydrogen peroxide and superoxide in relation to BP/ER controlling callus**  
316 **growth**

317 The histological examination indicated that the cell arrangement of *bp-5 er-105* calli  
318 was smaller and denser in the outer layer, but flaccid in the central region (Fig. 1J)  
319 compared to its wild-type Col (Fig. 1F). Observations using scanning electron  
320 microscopy (SEM) revealed that Col calli consisted of many globular nodules (Fig.  
321 1G), whereas *bp-5 er-105* calli had fewer globular nodules (Fig. 1K). Several  
322 previous studies indicated the role of ROS homeostasis in the callus development  
323 (Tang et al., 2004; Che et al., 2006; Zhang et al., 2018). To test whether the  
324 distribution of H<sub>2</sub>O<sub>2</sub> in *bp-5 er-105* callus cells was different from that in wild-type,  
325 we used the cerium chloride assay, in which cerium chloride forms electron-dense  
326 precipitates in the presence of H<sub>2</sub>O<sub>2</sub> through formation of cerium perhydroxide  
327 (Bestwick et al., 1997; Shen et al., 2015). With this assay, we observed apparently  
328 localized cerium precipitations in the *bp-5 er-105* callus cells (Fig 1O and P),  
329 especially in the cell wall (Fig 1P), in comparison with that of wild-type Col callus  
330 cells (Fig. 1H and I). This result indicated highly accumulation of H<sub>2</sub>O<sub>2</sub> in cells of  
331 *bp-5 er-105* double mutant during rapid growth.  
332 High level of H<sub>2</sub>O<sub>2</sub> could induce programmed cell death (PCD), which can be judged  
333 based on DNA fragmentation using the terminal deoxynucleotidyl transferase dUTP  
334 nick end labeling (TUNEL) assay (Biswas and Mano, 2015). More than 50% of the  
335 cells of 21 DAC *bp-5 er-105* callus had positive TUNEL staining, while less than 20%  
336 of the cells of wild-type (Col) and two single mutants *bp-5* and *er-105* callus  
337 displayed positive TUNEL staining (Fig. 2A). The ratio of death cells in *bp-5 er-105*  
338 callus was apparently higher than those of Col, *bp-5* and *er-105* callus, as detected by  
339 Evans blue (Fig 2B). To understand whether the defective callus growth and cell death  
340 of *bp-5 er-105* is related to the accumulation of H<sub>2</sub>O<sub>2</sub> in the cells, we analyzed H<sub>2</sub>O<sub>2</sub>  
341 and superoxide (O<sub>2</sub><sup>-</sup>) levels in *bp-5 er-105* callus by comparing with those in Col,  
342 *bp-5* and *er-105* callus, respectively. H<sub>2</sub>O<sub>2</sub> level in *bp-5 er-105* callus was apparently  
343 higher than those in Col, *bp-5* and *er-105* callus (Fig. 2D), whereas the O<sub>2</sub><sup>-</sup> level in  
344 *bp-5 er-105* callus was lower compared with those in Col, *bp-5* and *er-105*(Fig. 2C).

345 These results indicated that the function of H<sub>2</sub>O<sub>2</sub> scavenge in *bp-5 er-105* double  
346 mutant may be defective during rapid growth stage of callus.

347 ***BP* and *ER* promote expression of *AtPRX17* during callus growth**

348 The class III peroxidases (E. C. 1.11.1.7, PRXs) in plant tissue play important roles  
349 in removal of excess H<sub>2</sub>O<sub>2</sub> for maintaining a balance of ROS in tissue culture and the  
350 activities of peroxidase isoenzymes are important factors related to callus growth  
351 (Kay and Basile, 1987; Tournaire et al., 1996; Che et al., 2006).

352 We examine the patterns and activities of peroxidase isoenzymes in Col, *bp-5* and  
353 *er-105* and *bp-5 er-105* by a native polyacrylamide gel electrophoresis (PAGE)  
354 followed by in-gel 3, 3'-diaminobenzidine tetrahydrochloride (DAB) staining. Several  
355 bands corresponding to DAB-oxidizing active proteins were observed, among which  
356 one isoenzyme band was apparently weaker in *bp-5 er-105* callus than those in Col,  
357 and the corresponding single mutants *bp-5* and *er-105* callus (Fig. 3). These  
358 observations suggested that a specific peroxidase isoenzyme might be affected in *bp-5*  
359 *er-105* during callus growth.

360 To know if expression of some *PRX* genes in *bp-5 er-105* callus was altered at the  
361 transcription level, we re-examined expression levels of peroxidase genes in  
362 Arabidopsis callus according to microarray data published by previous studies (Che *et*  
363 *al.*, 2002; Che *et al.*, 2006). Among of the listed 73 genes of Arabidopsis class III  
364 PRXs, *peroxidase17* (*AtPRX17*, At2g22420) and *peroxidase52* (*AtPRX52*,  
365 At5g05340) were obviously up-regulated from 4 to 10 DAC during callus growth (Fig.  
366 S4), with the stage equivalent to that of rapid callus growth in our study (Fig. 1E).

367 Reverse transcription polymerase chain reaction (RT-PCR) analysis revealed that  
368 expression of *AtPRX52* in *bp-5 er-105* callus was not different from that in Col, *bp-5*  
369 and *er-105* callus (Fig. 4A), while expression of *AtPRX17* was apparently  
370 down-regulated in the callus of *bp-5 er-105*, compared with that of Col, *bp-5* and  
371 *er-105* (Fig. 4A and B). *AtPRX17* was selected for further study. A Salk T-DNA line  
372 (designated as *prx17*, SALK\_034684c) was identified as homozygous by PCR  
373 analysis and there was no expression of *AtPRX17* in the mutant callus (Fig S5). The  
374 growth rate of *prx17* callus was also apparently reduced in comparison with wild-type

375 Col (Fig. 4E) and similar to that of *bp-5 er-105* callus (Fig. 1E). The patterns of PAGE  
376 showed that the dramatically reduced intensity of a band in *prx17* mutant callus was  
377 consistent with that in *bp-5 er-105* callus (Fig 4C). Thus, it is possible that the  
378 peroxidase isoenzyme AtPRX17 (isoPRX17) is defective in *bp-5 er-105* callus.  
379 To test the possibility of AtPRX17 expression regulated by *BP* and *ER*, we  
380 constructed a fusion with the AtPRX17 cDNA under the control of the *35S* promoter  
381 (*35S<sub>pro</sub>::PRX17*), and introduced this fusion into the *bp-5 er-105* double mutant. A  
382 total of 12 independent transgenic plants were obtained, from which three  
383 homozygous lines for *35S<sub>pro</sub>::AtPRX17* were subsequently identified for further  
384 characterization (Fig. 5A). The activities of peroxidases isoenzymes in cell cultures of  
385 these three transgenic lines were further examined, and the putative isoPRX17 band  
386 was rescued (Fig. 5B). Additionally, the callus growth and cell death defects in the  
387 *35S pro:PRX17/bp-5 er-105* transgenic plants were all rescued compared with those  
388 in Col and *bp-5 er-105* double mutant plants (Fig. 6A and B). These results indicated  
389 that *BP* and *ER* maintain normal callus growth possibly via promoting expression of  
390 AtPRX17.

391

### 392 **BP binds to the TGAC motif in the AtPRX17 promoter**

393 To investigate whether *BP* directly regulates AtPRX17 expression, we  
394 computationally searched for the nucleotide sequence similar to that of the published  
395 BP-binding *cis*-element from the genebank ([www.arabidopsis.org](http://www.arabidopsis.org)) in AtPRX17  
396 promoter (Smith et al., 2002). Three motifs consisting of TGACANCT (N =A or T)  
397 were identified in AtPRX17 promoter region between -1732 bp and -1359 bp from  
398 the translation initiation site, including TGACAACCT from -1712 to -1704,  
399 TGACAACCT from -1680 to -1673, and TGACATCT from -1392 to -1385 (Fig. 7A).  
400 The interactions *in vitro* between the BP and the AtPRX 17 promoter region were  
401 further examined by electrophoretic mobility shift assays (EMSAs), using the  
402 recombinant BP proteins. The DNA fragment of the AtPRX17 promoter region from  
403 -1732 to -1359 bp, which contains three BP-binding motifs, was used as probe.

404 As shown in Figure 7A, a retarded band in the presence of the recombinant BP  
405 protein was observed. However, in the presence of excess amounts of the  
406 homologous unlabeled DNA fragment as competitor, the bound probe in the retarded  
407 band was apparently competed away. To further examine the function of BP in  
408 regulation of *AtPRX17* expression *in vivo*, a transient expression test was  
409 performed based on *agro*-infiltration of *Nicotiana benthamiana* leaves as described  
410 by the previous methods (Voinnet et al., 2003; Kane et al., 2007). In particular,  
411 tobacco leaves were co-infiltrated with two constructs: the reporter construct  
412 *AtPRX17<sub>pro</sub>::GUS* and the effector construct *35S<sub>pro</sub>::BP* (Fig. 7B). After infiltration  
413 and a 2-day recovery, the infiltrated leaves were collected for GUS staining, and  
414 GUS activity could reflect the *AtPRX17* promoter activity. GUS staining revealed  
415 that reporter construct alone only resulted in relatively low *AtPRX17* expression (Fig.  
416 7C, left panel), whereas GUS staining apparently increased in tobacco leaves when  
417 co-infiltrated with both effector and reporter constructs (Fig. 7C, right panel). These  
418 results further supported that BP could directly regulate *AtPRX17* gene expression.  
419 To provide more evidences that BP binds to the *AtPRX17* promoter, we performed a  
420 chromatin immunoprecipitation (ChIP) assay using wild-type callus, and our results  
421 confirmed that BP could bind to *AtPRX17* promoter *in vivo* (Fig. 7D).

422

### 423 **The ER-downstream target *WRKY6* also directly regulates the *AtPRX17*** 424 **expression**

425 ER protein is a membrane-bound leu-rich repeat receptor-like Ser/Thr kinase known  
426 as a pleiotropic regulator of multiple developmental and physiological processes and  
427 as a modulator to respond to environmental stimuli (Torii et al., 1996; Nanda et al.,  
428 2019). Previous studies show that ER regulates a set of *WRKY* transcription factor  
429 genes including *WRKY6*, *15*, *25*, *33*, and *46* (Terpstra et al., 2010). To test whether ER  
430 modulates callus growth through *WRKY* genes, we first analyzed the expression of  
431 *WRKY* genes. Compared with Col, expression of *WRKY6* was apparently  
432 down-regulated in *er-105* and *bp-5 er-105* callus (Fig. 8A), whereas expression of  
433 several other *WRKY* genes was also analyzed, such as, *WRKY15*, *WRKY25*, *WRKY33*

434 and *WRKY46*, but their expression was not significantly affected (Fig. 8A; Fig S6).  
435 Quantitative real-time PCR analysis demonstrated that expression of *WRKY6* in Col  
436 callus was gradually increased during 3 ~9 DAC, and attained to the highest level at 9  
437 DAC, coincident with expression pattern of *ER* during callus growth (Fig. 8B,  
438 compared to Fig. 1E). Thus, *WRKY6* was selected for further study.  
439 A mutant line with loss of *WRKY6* function, here referred to *wrky6*, was obtained (Fig.  
440 S7A and B), and used to construct *bp-5 wrky6* double mutant. Expression of *WRKY6*  
441 was severely reduced in *wrky6* and *bp-5 wrky6* double mutant (Fig S7C). The activity  
442 of the band corresponding to *AtPRX17* in the *bp-5 wrky6* callus was apparently  
443 reduced, similar to that in *bp-5 er-105*, but markedly lower than those of the Col, *bp-5*,  
444 and *wrky6* (Fig. 8C). Furthermore, the growth rate of the *bp-5 wrky6* callus was  
445 significantly decreased compared with that of wild-type callus, but similar to that of  
446 the *bp-5 er-105* callus (Fig S8). These results indicated that *WRKY6* is involved in  
447 regulating the expression of *AtPRX17*.  
448 To further explore whether *WRKY6* also directly regulates the *AtPRX17* gene, we again  
449 examined the *AtPRX17* promoter, trying to identify nucleotide sequence that *WRKY6*  
450 binds to. Two previously reported WRKY-binding cis-motifs, TTGACC (Robatzek *et*  
451 *al.*, 2002), were found in the *AtPRX17* promoter between -1119 to -1114 and between  
452 -1005 and -1000 from the translation initiation site (Fig. 9A). The physical  
453 interaction between the *WRKY6* and *AtPRX17* promoter region was examined by  
454 EMSA as we have described above for the BP protein. The DNA fragment of the  
455 *AtPRX17* promoter region from -1141 to -981 was used as probe. As shown in Figure  
456 8A, a retarded band in the presence of the recombinant *WRKY6* protein was observed.  
457 In the presence of excess amounts of the unlabeled competitor fragment, the amount  
458 of the labeled retarded complexes was obviously reduced (Fig. 9A). These results  
459 suggested that *WRKY6* also specifically binds to the *AtPRX17* promoter.  
460 To test the possible *WRKY6* function in directly regulating *AtPRX17* expression *in*  
461 *vivo*, we performed the transient assay through agro-infiltration of *Nicotiana*  
462 *benthamiana* leaves with the *35S<sub>pro</sub>::WRKY6* effector and *PRX17<sub>pro</sub>::GUS* reporter  
463 constructs (Fig. 9B). GUS staining revealed that reporter construct alone only resulted



464 in relatively low *AtPRX17* expression (Fig. 9C, left panel), whereas GUS staining  
465 apparently increased in tobacco leaves when co-infiltrated with both effector and  
466 reporter constructs (Fig. 9C, right panel). Our results showed that similar to the  
467 *35S<sub>pro</sub>::BP* effector, *35S<sub>pro</sub>::WRKY6* effector also enhanced the expression of  
468 *AtPRX17*.

## 469 **Discussion**

470 The class III peroxidases (PRXs) are a kind of plant-specific oxidoreductase that is  
471 involved in a broad range of physiological processes throughout the plant life cycle,  
472 including lignification, suberization, auxin catabolism, wound healing and defense  
473 against pathogen (Kay and Basile, 1987; Hiraga et al., 2001; Tognolli et al., 2002;  
474 Welinder et al., 2002; Passardi et al., 2006; Almagro et al., 2009; Cosio and Dunand,  
475 2010; Herrero et al., 2013). Recent advances indicated that the processes directly or  
476 indirectly targeted by PRXs include gene expression, post-transcriptional reactions,  
477 and switching or tuning of metabolic pathways and other cell activities (Liebthal et al.,  
478 2018). However, little is known about the signal transduction for regulating  
479 expression of PRX genes. Previous studies show that the promoter region of  
480 peroxidase genes contains the transcription factor (TF) binding sequence. For  
481 example, AGL2 and /or WUS binding sites were detected in the promoter region of  
482 *PRX13*, *PRX30* and *PRX55* (Cosio and Dunand, 2010), but the specific function and  
483 precise role of these TFs remains unclear. In this study, we provide new evidences that  
484 BP together with WRKY6 directly regulate the expression of *AtPRX17* in Arabidopsis  
485 callus by binding to its promoter region.

486 Callus is like the meristematic tissues, which is a self-renewing structure consisting of  
487 stem cells and their immediate daughters (Springer and Kohn, 1979; Xiao et al., 2020),  
488 but the mechanism on how to maintain this self-renewing structure is unclear.

489 Reactive oxygen species (ROS) play an important role in maintaining plant cell  
490 proliferation (Vemoux et al., 2000; Wells et al., 2010). In Arabidopsis, two main ROS,  
491 superoxide ( $O_2^{\cdot-}$ ) and hydrogen peroxide exhibit distinct patterns of distribution in  
492 root tissues (Dunand et al., 2007).  $O_2^{\cdot-}$  and  $H_2O_2$  mainly accumulate in dividing and  
493 expanding cells in the meristem and elongation zones of root tips, respectively (Wells

494 et al., 2010). Peroxidases have been suggested to be related with production (Mäder et  
495 al., 1980; Bolwell et al., 1995) and scavenging (Mehlhorn et al., 1996; Kvaratskhelia  
496 et al., 1997) of hydrogen peroxide and play an important role in the cell proliferation  
497 and senescence of higher plants (Abeles et al., 1988; Oh et al., 1997; Kay and Basile,  
498 1987; Tsukagoshi et al., 2010). The class III peroxidase multigene family in  
499 Arabidopsis genome show specific expression patterns in different developmental  
500 stages and organs (Tognolli et al., 2002). For example, in callus from Arabidopsis root  
501 explant, expression of *PRX73*, *PRX ATP21a*, *PRX27*, *PRXATP8a*, *PRX13a*,  
502 *PRXATP11a* and *ATP19a* were obviously down-regulated, while expression of  
503 *PRXATP12a* was up-regulated (Che et al., 2006). *PRX1*, which was mediated by *ABI3*,  
504 has been found to be specifically expressed in the embryo and aleurone layer during  
505 maturation and desiccation stage of development (Haslekås et al., 2003). Although  
506 these previous studies have found the appearance or disappearance of specific  
507 peroxidase isoforms during a particular process or in a particular localization (Loukii  
508 et al., 1999; Allison & Schultz, 2004), it is difficult to associate the band observed on  
509 an PAGE gel with a particular protein and define their roles in certain specific  
510 developmental processes, because protein purification of peroxidase isoenzymes is  
511 not straight forward as well as no obvious quantitative relationship exists between the  
512 transcript expression level and the protein activity (Dunand et al., 2003; Cosio and  
513 Dunand, 2009). In this study, either mutation of *AtPRX17* gene in *prx17* mutant or  
514 impaired isoAtPRX17 in double mutants *bp-5 er-105* or *bp-5 wrky6* resulted in an  
515 apparently decrease in the growth rate of callus (Fig 1E, Fig S8). Concentration of  
516 H<sub>2</sub>O<sub>2</sub> in the isoPRX17 deficiency mutant callus was apparently higher than that in Col  
517 (Fig 1P, Fig 2C and D). Thus, we assumed that isoPRX17 could be essential in  
518 maintaining ROS homeostasis during Arabidopsis callus development.  
519 We further found that *AtPRX17* could be specific in *BP/ER* pathway. *BP* has  
520 previously been shown to be redundant with *ER* to influence inflorescence stem and  
521 pedicel differentiation through local regulation of the level, or response to, a  
522 vasculature-associated growth inhibitory signal (Douglas et al., 2002; Douglas and  
523 Riggs, 2005). Recently *BP* and *ER* were found to involve in preventing precocious

524 initiation of fiber differentiation during wood development (Vera-Sirera et al., 2019).  
525 However, which signaling pathway is involved in BP/ER pathway is still not clear. In  
526 this study, *BP* and *ER* are functionally redundant in promoting callus growth and  
527 inhibiting tissue browning. Analysis of the peroxidase isoenzyme patterns by a native  
528 PAGE gel indicated that double mutations in *BP* and *ER* genes resulted in deficiency  
529 of a PRX isoenzyme band, which is corresponding to AtPRX17 isoenzyme (iso  
530 PRX17). Furthermore, the absence of isoPRX17 band in *bp-5 er-105* double mutant  
531 callus could be rescued in the *35S<sub>pro</sub>::PRX17/bp-5, er-105* transgenic lines. Thus, *BP*  
532 and *ER* could regulate expression of *AtPRX17* gene by affecting its promoter activity.  
533 Although the BP recognition site is unknown, three binding sites for the KNOX gene  
534 *BP/KNAT1* (TGACAG(G/C)T) (Smith et al., 2002; Bolduc et al., 2012) are present at  
535 location -1732 bp to -1359 bp relative to the putative transcription start site in the  
536 promoter of *AtPRX17*, suggesting that BP might directly bind to the *AtPRX17*  
537 promoter region. Further EMSAs and transient assays using tobacco leaves also  
538 demonstrated that BP could directly bind to the *AtPRX17* promoter region and affect  
539 its activity. However, the down-regulation of *AtPRX17* transcript level was only  
540 observed in *bp-5 er-105* double mutant, but not in either *bp-5* or *er-105* single mutant.  
541 This implied that *AtPRX17* could be a target of both BP and ER proteins. ER protein  
542 is a membrane-bound leu-rich repeat receptor-like Ser/Thr kinase (LRR-RLK; Torii et  
543 al., 1996; Van Zanten et al., 2009), but not a transcript factor (TF), it is impossible to  
544 regulate the expression of *AtPRX17* gene by directly binding to the promoter region.  
545 TFs regulated by ER have been reported (Terpstra et al., 2010). For example, *WRKY6*  
546 was suggested to act downstream of *ER* (Terpstra et al., 2010). In our study, two  
547 *WRKY6* binding sites (TTGACC) (Robatzek et al., 2002) close to one *KNAT1* binding  
548 site (TGACATCT) were also observed in the promoter of *AtPRX17* from -1141bp to  
549 -981bp upstream of the putative transcription start site. In addition, *WRKY6* protein  
550 bonded to the DNA segment of *AtPRX17* promoter was also found with a much  
551 higher affinity *in vitro* and *vivo*. These observations suggest that the function of ER  
552 convergently with BP to influence callus growth could be via *WRKY6*, which  
553 directly regulate expression of *AtPRX17* gene.

554 Previous studies indicate that KNOX TFs in plant have degenerate binding sites and  
555 acquire specificity through cooperation with binding partners, as found in animals  
556 (Bolduc et al., 2009; Moens and Selleri, 2006). For example, KNOX proteins bind  
557 DNA as heterodimers with BELL proteins, another class of TALE HD protein  
558 (Bellaoui et al., 2001; Smith et al., 2002). KNOX and BELL share similar in vitro  
559 consensus binding sites, and their heterodimerization increases their affinity for DNA  
560 (Smith *et al.*, 2002; Viola & Gonzalez, 2006). In this study, mutation of *BP* could  
561 cause inhibition of callus proliferation and *AtPRX17* band deficiency, but this was  
562 only observed in an *er-105* or *wrky6* background. WRKY6 likely acts downstream of  
563 ER and as a cofactor of BP in regulating expression of *AtPRX17* gene during callus  
564 development. Further studies should clarify the mechanism of how ER regulates  
565 *WRKY6* in Arabidopsis callus, and whether BP interacts with WRKY6 to form  
566 complex for regulating *AtPRX17* in vivo.

567

#### 568 **Supplementary data**

569 **Fig. S1.** Callus was induced from Arabidopsis root explants.

570 **Fig. S2.** Callus induction from root explants of wild-type Col, single mutants *bp5* and  
571 *er-105* and double mutant *bp5/er-105* after 21 days on the callus induce medium.

572 **Fig. S3.** Growth of a double mutant *bp-1* and their single mutant *Ler (BP/er)* and  
573 *bp/ER*, respectively, in comparison with their wild-type (Lan)..

574 **Fig. S4.** Time-resolved cluster analysis showing ratios of callus-developing related  
575 increases of Class III peroxidases in transcript abundances.

576 **Fig. S5.** Identification of homozygous insertion mutants at the *PRX17* locus.

577 **Fig. S6.** RT-PCR analysis of *WRKY25*, *WRKY33* and *WRKY46* expression in the  
578 callus of *er-105* and Col, respectively.

579 **Fig. S7.** Identification of homozygous insertion mutants at the *WRKY6* locus

580 **Fig. S8.** Comparison of growth rate of *bp-5 wrky6* double mutant callus with that of  
581 *bp-5 er-105* and *prx17* mutant callus, respectively.

582 **Table S1.** Oligonucleotide primers used in this study.

583

#### 584 **Acknowledgments**

585 The authors are indebted to Prof. Hai Huang for suggestions and Mr. Zhiping Zhang  
586 for EM works. This work was supported by the National Natural Science Foundation  
587 of China (31870850), the Strategic Pioneer Projects of CAS (XDB37020104), the

588 China Manned Space Flight Technology project Chinese Space Station, the National  
589 natural fund joint fund project (U1738106).

590

591 **Author Contributions:** JX carried out cell culture, data curation and analysis, BQ  
592 investigated gene expression; LW, YW and CM participated in investigation, HZ  
593 conceived of the study, participated in its design and coordination, and drafted the  
594 manuscript. All authors have read and agreed to the published version of the  
595 manuscript.

596

597 **Conflicts of Interest:** The authors declare that they have no conflict of interest.

598

## References

Abeles FB, Dunn LJ, Morgens P, Callahan A, Dinterman RE, Schmidt J. 1988.

Induction of 33-kD and 60-kD peroxidases during ethylene-induced senescence of cucumber cotyledons. *Plant Physiology* 87, 609-615.

Almagro L, Gómez Ros LV, Belchi-Navarro S, Bru R, Ros Barceló A, Pedreño

MA.2009. ClassIII peroxidases in plant defence reactions. *Journal of Experimental Botany* 60, 377-390.

Allison, SD. and Schultz JC. 2004. Differential activity of peroxidase isozymes in response to wounding, gypsy moth, and plant hormones in northern red oak (*Quercus rubra* L.). *Journal of Chemical Ecology* 30,1363-1379.

Apel, K, Hirt H. 2004. Reactive oxygen species: Metabolism, oxidative stress, and signal transduction. *Annual Review of Plant Biology* 55, 373-399.

Baker CJ, Mock NM.1994. An improved method for monitoring cell death in cell suspension and disc assays using evans blue. *Plant Cell, Tissue and Organ Culture* 39, 7-12.

Bellaoui M, Pidkowich MS, Samach A, Kushalappa K, Kohalmi SE, Modrusan Z, Crosby WL, Haughn GW. 2001. The Arabidopsis BELL1 and KNOX TALE homeodomain proteins interact through a domain conserved between plants and animals. *The Plant Cell* 13, 2455-2470.

- Basile, DV. 1980. A Possible Mode of Action for Morphoregulatory Hydroxyproline-Proteins. *Bulletin of the Torrey Botanical Club* 107, 325-338.
- Bestwick, CS, Brown IR, Bennett, MHR, Mansfield JW. 1997. Localization of hydrogen peroxide accumulation during the hypersensitive reaction of lettuce cells to *Pseudomonas syringae* pv *phaseolicola*. *The Plant Cell* 9, 209-221.
- Biswas, MS, Mano J. 2015. Lipid Peroxide-Derived Short-Chain Carbonyls Mediate Hydrogen Peroxide-Induced and Salt-Induced Programmed Cell Death in Plants. *Plant Physiology* 168, 885-898.
- Bolduc N, Hake S. 2009. The maize transcription factor KNOTTED1 directly regulates the gibberellin catabolism gene *ga2ox1*. *The Plant Cell* 21, 1647-1658.
- Bolduc N, Yilmaz A, Mejia-Guerra MK, Morohashi K, O'Connor D, Grotewold E, Hake S. 2012. Unraveling the KNOTTED1 regulatory network in maize meristems. *Genes & Development* 26,1685-1690.
- Bolwell GP, Butt VS, Davies DR, Zimmerlin A. 1995. The origin of the oxidative burst in plants. *Free Radical Research* 23,517-532.
- Breusegem FV, Dat JF. 2006. Reactive oxygen species in plant cell death. *Plant Physiology* 141,384-390.
- Brewbaker JL, Upadhyya MD, Mäkinen Y, MacDonald T. 1968. Isoenzyme polymorphism in flowering plants. III. Gel electrophoretic methods and applications. *Physiologia Plantarum* 21,930-940.
- Brown, JA, Li D, Alic M, Gold MH. 1993. Heat Shock Induction of Manganese Peroxidase Gene Transcription in *Phanerochaete chrysosporium*. *Applied and Environmental Microbiology* 59, 4295-4299.
- Che P, Gingerich DJ, Lall S, Howell SH. 2002. Global and cytokinin-related gene expression changes during shoot development in *Arabidopsis*. *The Plant Cell* 14, 2771-2785.
- Che P, Lall S, Nettleton D, Howell SH. 2006. Gene expression programs during shoot, root, and callus development in *Arabidopsis* tissue culture. *Plant Physiology* 141, 620-637.

- Clough SJ, Bent AF. 1998. Floral dip: a simplified method for Agrobacterium-mediated transformation of *Arabidopsis thaliana*. *The Plant Journal* 16, 735-743.
- Cosio, C and Dunand C. 2009. Specific functions of individual class III peroxidase genes. *Journal of Experimental Botany* 60, 391-408.
- Cosio C, Dunand C. 2010. Transcriptome analysis of various flower and silique development stages indicates a set of class III peroxidase genes potentially involved in pod shattering in *Arabidopsis thaliana*. *BMC Genomics* 11, 528
- Creissen CP, Edwards EA, Mullineaux PM. 1994. Glutathione reductase and ascorbate peroxidase. In *Cause of photooxidative stress and amelioration of defense systems in plants*, Foyer CH, Mullineaux PM (eds) pp 344–364. CRC Press, Boca Raton, USA
- Daudi, A, Cheng Z, O'Brien JA, Mammarella N, Khan S, Ausubel FM, Bolwell GP. 2012. The apoplastic oxidative burst peroxidase in *Arabidopsis* is a major component of pattern-triggered immunity. *The Plant Cell* 24, 275-287.
- Douglas SJ, Chuck G, Dengler RE, Pelecanda L, Riggs CD. 2002. *BP* and *ERECTA* regulate inflorescence architecture in *Arabidopsis*. *The Plant Cell* 14, 547-558
- Douglas SJ, Riggs CD. 2005. Pedicel development in *Arabidopsis thaliana*: Contribution of vascular positioning and the role of the *BREVIPEDICELLUS* and *ERECTA* genes. *Developmental Biology* 284, 451-463.
- Dunand, C, Meyer M De, Crevecoeur M, Penel C. 2003. Expression of a peroxidase gene in zucchini in relation with hypocotyl growth. *Plant Physiology and Biochemistry* 41, 805-811.
- Dunand C, Crevecoeur M, Penel C. 2007. Distribution of superoxide and hydrogen peroxide in *Arabidopsis* root and their influence on root development: possible interaction with peroxidases. *New Phytologist* 174, 332-341.
- Eulgem T and Somssich IE. 2007. Networks of WRKY transcription factors in defense signaling. *Current Opinion in Plant Biology* 10, 366-371.
- Felipo-Benavent A, Urbez C, Blanco-Tourinan N, Serrano-Mislata A, Baumberger N, Achard P, Agusti J, Blazquez MA, Alabadi D. 2018. Regulation of xylem fiber

differentiation by gibberellins through DELLA-KNAT1 interaction.

Development 145, 1-7.

Goff, CW. 1975. Light and Electron-Microscopic Study of Peroxidase Localization in Onion Root Tip. American Journal of Botany 62, 280-291.

Habib D, Chaudhary MF, Zia M. 2014. The study of ascorbate peroxidase, catalase and peroxidase during in vitro regeneration of *Argyrolobium roseum*. Applied Biochemistry and Biotechnology 172, 1070-84.

Haslekås C, Viken MK, Grini PE, Nygaard V, Nordgard SH, Meza TJ, Aalen RB. 2003. Seed 1-cysteine peroxiredoxin antioxidants are not involved in dormancy, but contribute to inhibition of germination during stress. Plant Physiology 133,1148-1157.

Hay A, Tsiantis M. 2010. KNOX genes: versatile regulators of plant development and diversity. Development 137, 3153-3165.

Herrero J, Esteban-Carrasco A, Zapata JM. 2013. Looking for *Arabidopsis thaliana* peroxidases involved in lignin biosynthesis. Plant Physiology and Biochemistry 67,77-86.

Hord CLH, Suna YJ, Pillitteri LJ, Torii KU, Wang HC, Zhang SQ, Ma H. 2008. Regulation of *Arabidopsis* early anther development by the mitogen-activated protein kinases, MPK3 and MPK6, and the ERECTA and related receptor-like kinases. Molecular Plant 1: 645-658

Ikeuchi, M, Sugimoto, K, Iwase A. 2013. Plant callus: mechanisms of induction and repression. The Plant cell 25, 3159–3173.

Kane NA, Agharbaoui Z, Diallo AO, Adam H, Tominaga Y, Ouellet F, Sarhan F. 2007. TaVRT2 represses transcription of the wheat vernalization gene TaVRN1. The Plant Journal 51, 670-680.

Kay LE, Basile DV. 1987. Specific peroxidase isoenzymes are correlated with organogenesis. Plant Physiology 84, 99-105.

Kvaratskhelia M, Winkel C, Thorneley RNF. 1997. Purification and characterization of a novel class III peroxidase isoenzyme from tea leaves. Plant Physiology 114:1237-1245



- Laukkanen H, Haggman H, Kontunen-Soppela S, Hohtola A. 1999. Tissue browning of in vitro cultures of Scots pine: Role of peroxidase and polyphenol oxidase. *Physiologia Plantarum* 106, 337-343.
- Liebthal M, Maynard D, Dietz KJ. 2018. Peroxiredoxins and Redox Signaling in Plants. *Antioxidants & Redox Signaling* 28, 609-624.
- Lincoln C, Long J, Yamaguchi J, Serikawa K, Hake S. 1994. A Knotted1-Like homeobox gene in Arabidopsis is expressed in the vegetative meristem and dramatically alters leaf morphology when overexpressed in transgenic plants. *The Plant Cell* 6, 1859-1876.
- Loukili A, Limam F, Ayadi A, Boyer N, Ouelhazi L. 1999. Purification and characterization of a neutral peroxidase induced by rubbing tomato internodes. *Physiologia Plantarum* 105, 24–31.
- Mäder M, Ungemach J, Schloss P. 1980. The role of peroxidase isoenzyme groups of *Nicotiana tabacum* in hydrogen peroxide formation. *Planta* 147, 467-470.
- Mehlhorn H, Lelandais M, Korth HG, Foyer CH. 1996. Ascorbate is the natural substrate for plant peroxidases. *FEBS Letters* 378, 203-206.
- Mele G, Ori N, Sato Y, Hake S. 2003. The knotted1-like homeobox gene *BREVIPEDICELLUS* regulates cell differentiation by modulating metabolic pathways. *Genes & Development* 17, 2088-2093.
- Milhinhos A, Vera-Sirera F, Blanco-Tourinan N, et al. 2019. SOBIR1/EVR prevents precocious initiation of fiber differentiation during wood development through a mechanism involving *BP* and *ERECTA*. *Proceedings of the National Academy of Sciences of the United States of America* 116, 18710-18716.
- Moens CB, Selleri L. 2006. Hox cofactors in vertebrate development. *Developmental Biology* 291,193-206.
- Murashige T, Skoog F. 1962. A revised medium for rapid growth and bioassays with tobacco tissue cultures. *Physiologia Plantarum* 15, 473–497.
- Nanda AK, El Habti A, Hocart CH, Masle J. 2019. *ERECTA* receptor-kinases play a key role in the appropriate timing of seed germination under changing salinity. *Journal of Experimental Botany* 70, 6417-6435.

- Naton B, Ecke M, Hampp R. 1992. Production of fertile hybrids by electrofusion of vacuolated and evacuated tobacco mesophyll protoplasts. *Plant Science* 85, 197-208.
- Oh SA, Park JH, Lee GI, Paek KH, Park SK, Nam HG. 1997. Identification of three genetic loci controlling leaf senescence in *Arabidopsis thaliana*. *The Plant Journal* 12, 527-535.
- Ori N, Eshed Y, Chuck G, Bowman JL, Hake S. 2000. Mechanisms that control knox gene expression in the Arabidopsis shoot. *Development* 127, 5523-5532.
- Passardi F, Tognolli M, De Meyer M, Penel, Dunand C. 2006. Two cell wall associated peroxidases from Arabidopsis influence root elongation. *Planta* 223, 965-974.
- Qi B, Zheng HQ. 2013. Modulation of root-skewing responses by *BP* in *Arabidopsis thaliana*. *The Plant Journal* 76, 380-392.
- Robatzek S, Somssich IE. 2002. Targets of AtWRKY6 regulation during plant senescence and pathogen defense. *Genes & Development* 16, 1139-1149.
- Serikawa, KA, Martinez LA, Zambryski P. 1996. Three knotted1-like homeobox genes in Arabidopsis. *Plant Molecular Biology* 32, 673-683.
- Sinha NR, Williams RE, Hake S. 1993. Overexpression of the maize homeobox gene, KNOTTED-1, causes a switch from determinate to indeterminate cell fates. *Genes and Development* 7, 787-795.
- Shpak ED, Berthiaume CT, Hill EJ, Torii KU. 2003. Synergistic interaction of three ERECTA-family receptor-like kinases controls Arabidopsis organ growth and flower development by promoting cell proliferation. *Development* 131, 1491-1501.
- Shen J, Xu G, Zheng HQ. 2015. Apoplastic barrier development and water transport in *Zea mays* seedling roots under salt and osmotic stresses. *Protoplasma* 252, 173-180.
- Smith HM, Boschke I, Hake S. 2002. Selective interaction of plant homeodomain proteins mediates high DNA-binding affinity. *Proceedings of the National Academy of Sciences of the United States of America* 99, 9579-9584.

- Springer WD, Green CE, Kohn KA. 1979. A histological examination of tissue culture initiation from immature embryos of Maize. *Protoplasma* 101, 269-281.
- Tang, W, Newton RJ, Outhavong V. 2004. Exogenously added polyamines recover browning tissues into normal callus cultures and improve plant regeneration in pine. *Physiologia Plantarum* 122, 386-395.
- Terpstra IR, Snoek LB, Keurentjes JJB, Peeters AJM, van den Ackerveken G. 2010. Regulatory network identification by genetical genomics: signaling downstream of the Arabidopsis receptor-like kinase *ERECTA*. *Plant Physiology* 154, 1067-1078.
- Tognolli M, Penel C, Greppin H, Simon. 2002. Analysis and expression of the class III peroxidase large gene family in Arabidopsis thaliana. *Gene* 288,129-138.
- Torii KU, Mitsukawa N, Oosumi T, Matsuura Y, Yokoyama R, Whittier RF, Komeda Y. 1996. The Arabidopsis *ERECTA* gene encodes a putative receptor protein kinase with extracellular leucine-rich repeats. *The Plant Cell* 8, 735-746.
- Tournaire, C, Kushnir S, Bauw G, Inze D, de la Serve BT, Renaudin JP. 1996. A thiol protease and an anionic peroxidase are induced by lowering cytokinins during callus growth in Petunia. *Plant Physiology* 111, 159-168.
- Tsukagoshi, H, Busch W, Benfey PN. 2010. Transcriptional regulation of ROS controls transition from proliferation to differentiation in the root. *Cell* 143, 606-616.
- Venglat SP, Dumonceaux T, Rozwadowski K, Parnell L, Babic V, Keller W, Martienssen R, Selvaraj G, Datla R. 2002. The homeobox gene *BREVIPEDICELLUS* is a key regulator of inflorescence architecture in Arabidopsis. *Proceedings of the National Academy of Sciences of the United States of America* 99, 4730-4735.
- Van Zanten M, Snoek LB, Proveniers MCG, Peeters AJM. 2009. The many functions of *ERECTA*. *Trends in Plant Science* 14, 214-218.
- Vemoux T, Wilson RC, Seeley KA, Reichheld JP, Muroy S, Brown S, Maughan SC, Cobbett CS, van Montagu M, Inzé D et al. 2000. The *ROOT MERISTEMLESS1/CADMIUM SENSITIVE2* gene defines a

- glutathione-dependent pathway involved in initiation and maintenance of cell division during postembryonic root development. *The Plant Cell* 12, 97-109.
- Viola IL, Gonzalez DH. 2006. Interaction of the BELL-like protein ATH1 with DNA: Role of homeodomain residue 54 in specifying the different binding properties of BELL and KNOX proteins. *Journal of Biological Chemistry* 387, 31-40.
- Voinnet O, Rivas S, Mestre P, Baulcombe D. 2003. An enhanced transient expression system in plants based on suppression of gene silencing by the p19 protein of tomato bushy stunt virus. *The Plant Journal* 33, 949-956.
- Wakui K, Takahata Y, Kaizuma N. 1999. Scanning electron microscopy of desiccation-tolerant and sensitive microspore-derived embryos of *Brassica napus* L. *Plant Cell Reports* 18, 595-600.
- Wei N, Tan C, Qi B, Zhang Y, Xu GX, Zheng HQ. 2010. Changes in gravitational forces induce the modification of *Arabidopsis thaliana* silique pedicel positioning. *Journal of Experimental Botany* 61, 3875-3884.
- Welinder KG, Justesen AF, Kjaersgard IVH, Jensen RB, Rasmussen SK, Jespersen HM, Duroux L. 2002. Structural diversity and transcription of class III peroxidases from *Arabidopsis thaliana*. *European Journal of Biochemistry* 269, 6063-6081.
- Wells DM, Wilson MH, Bennett MJ. 2010. Feeling UPBEAT about growth: linking ROS gradients and cell proliferation. *Developmental Cell* 19, 644-646.
- Woerlen N, Allam G, Popescu A, Corrigan L, Pautot V, Hepworth SR. 2017. Repression of BLADE-ON-PETIOLE genes by KNOX homeodomain protein *BREVIPEDICELLUS* is essential for differentiation of secondary xylem in *Arabidopsis* root. *Planta* 245, 1079-1090.
- Xiao Y, Li J, Zhang Y, Zhang X, Liu H, Qin Z, Chen B. 2020. Transcriptome analysis identifies genes involved in the somatic embryogenesis of *Eucalyptus*. *BMC Genomics*. 21, 803.
- Zhang H, Chen J, Zhang F, Song Y. 2019. Transcriptome analysis of callus from melon. *Gene* 684, 131-138.

Zhang K, Su J, Xu M, Zhou Z, Zhu X, Ma X, Hou J, Tan L, Zhu Z, Cai H et al. 2020  
A common wild rice-derived BOC1 allele reduces callus browning in indica rice  
transformation. Nature Commucation 11, 443.

Zhang Y, Wang L, Xie J, Zheng H. 2015. Differential protein expression profiling of  
*Arabidopsis thaliana* callus under microgravity on board the Chinese SZ-8  
spacecraft. Planta 241, 475-488.

Zhao M, Li C, Ma X, Xia R, Chen J, Liu X, Ying P, Peng M, Wang J, Shi CL et al.  
2020. KNOX protein KNAT1 regulates fruitlet abscission in litchi by repressing  
ethylene biosynthetic genes. Journal Experimental Botany 71, 4069-4082.

## 599 **Figure Legends**

600 **Fig.1** *BP* and *ER* genes implicate in callus growth and browning. A-D Callus of  
601 wild-type Col (A), single mutant *er-105*(B) and *bp5* (C) and double mutant *bp5 er-105*  
602 (D) after 3 weeks cultured on MS medium. Note that double mutant *bp5 er-105* callus  
603 appears smaller and oxidative browning (D). Scale bars, 10 mm. E The growth rate of  
604 culture cells among the double mutant (*bp-5 er-105*) , single mutant (*er-105* and *bp-5*)  
605 and Col. Error bars indicate the Standard deviation of the mean for three  
606 replications( $n \geq 20$  calli for each time point). (F and J) Resin sections of Col (F) and  
607 *bp5 er-105* (J) callus. Scale bars, 100 $\mu$ m. G and K Scanning electron microscopy  
608 images of Col (G) and *bp5er-105* (K) callus. Scale bars, 100 $\mu$ m.

609  
610 **Fig. 2** Comparison of cell death and endogenous  $O_2^-$  and  $H_2O_2$  content in callus of  
611 *bp-5 er-105* with Col, *bp-5* and *er-105*. (A ) Typical TUNEL assay fluorescence microscopy  
612 images of the 21-day calli and their phase-contrast microscopy (DIC) images. Scale bars,  
613 200 $\mu$ m. (B) Evaluation of cell death in 21-day calli of Col, single mutants (*er-105* and *bp-5*)  
614 and double mutant (*bp-5 er-105*). The callus was stained with Evans blue (EB) as described in  
615 Methods. Cellular uptake of Evans blue was quantified by spectrophotometry at OD<sub>600</sub> nm.  
616 Values represent means  $\pm$  standard deviation (SD) (n=10; student's t-test \*\*p < 0.001). (C

617 and D) Quantification of nitroblue tetrazolium (NBT) and diaminobenzidine oxide (DAB  
618 staining intensity of Col, *bp5*, *er105* and *bp5 er105*, respectively. The staining intensity of Col  
619 is given as 100%, of which the staining intensity of mutants was compared, respectively.

620 Values represent means  $\pm$  standard deviation (SD), (n=20, student' s t-test \*\*p < 0.001).

621

622 **Fig. 3** Isoenzyme analysis of peroxidases in developing callus of *bp-5 er-105*, *bp-5*, *er-105* and  
623 Col. (A) Native PAGE gels stained for peroxidase activity. Note that a band (asterisk indicating) in  
624 double mutant *bp-5 er-105* callus was weaker significantly in comparison with that of *bp-5*, *er-105*  
625 and Col callus, respectively.

626 (B) Protein stained with Coomassie Brilliant Blue (CBB) was used as loading control.

627

628 **Fig. 4** The absence of a peroxidase isoenzyme band of *bp-5 er-105* double mutant calli is  
629 consistent with that of *prx17* mutant calli. (A) The expression analysis of *PRX17* and *PRX52*  
630 genes in callus of different genotypes by RT-PCR. Note that expression of *PRX17* gene was  
631 apparently down-regulated in *bp-5 er-105* double mutant in comparison with that in *er-105*, *bp-5*  
632 and Col callus, respectively. Total RNA samples were extracted from callus grown on a new  
633 medium for 14 days after subcultured. (B) qRT-PCR analysis of *PRX17* transcription levels in  
634 *bp-5er-105* in comparison with that in *er-105*, *bp-5* and Col calli, respectively. Values represent  
635 means  $\pm$  standard deviation (SD) (n=3) and results were consistent in at least three biological  
636 replicates. (C) Isoenzyme analysis of peroxidases in *bp-5 er-105*, *er-105*, *bp-5*, Col and *prx17*  
637 mutant callus by PAGE (50 $\mu$ g proteins/lane). Note that a band (arrows point) is absent in both  
638 *bp-5 er-105* and *prx17* in comparison with that in *er-105*, *bp-5* and Col, respectively.

639 (D) A represent band in SDS-PAGE visualized by staining with Coomassie brilliant blue (CBB)  
640 was used as loading control. (E) Growth rate of *prx17* culture cells in comparison with that of Col.  
641 Error bars indicate the Standard deviation of the mean for three replications (n=16 calli for each  
642 time point; \*p < 0.05, \*\*p < 0.001, student' s t test).

643

644 **Fig. 5** Substitution of *PRX17* promoter with 35S promoter in *bp-5 er-105* double mutant could  
645 rescue the loss band of the peroxidase isoemzyme in the native PAEG gel. (A) RT-PCR analysis of

646 *PRX17* expression in *35S::PRX17/bp-5 er-105* transgenic lines(*bp-5 er-105* background). Total  
647 RNA samples were isolated from 14-day -old subculture callus. **(B)** Analysis of peroxidase  
648 isoenzymes in callus of *35S::PRX17/bp-5,er-105* transgenic line and the indicated mutants by  
649 PAGE (50µg proteins/lane). Noted that the lost band (asterisks indicate) of peroxidase  
650 isoemzymes in *bp-5 er-105* and *prx17* callus was rescued in the *35S::PRX17/bp-5 er-105*  
651 transgenic lines (e.g. line #8, #9 and #10) (arrow indicates). A represent band in SDS-PAGE  
652 visualized by staining with Coomassie brilliant blue (CBB) was used as loading control.

653

654 **Fig. 6** The growth rate of *prx17* mutant callus and *35S::PRX17* callus in comparison with that of  
655 *bp-5 er105* double mutant callus and wild-type Col callus, respectively.

656 **(A)** Comparison of growth rate (expressed as an increase in callus fresh weight) of callus cultures  
657 derived from *bp5 er-105*, Col, *prx17*, *35S::PRX17* root explants. 0.1g fresh weight callus of each  
658 indicating genotype was inoculated on the new CIM medium for 8 days and then measured the fresh  
659 weight. The increase in fresh weight of Col is given as 1.0, of which other mutants were compared,  
660 respectively. Values represent means  $\pm$  standard deviation (SD) (n=15~20).

661 **(B)** Evaluation of cell death by Evans blue (EB) staining. Callus inoculated with new medium for  
662 2 weeks was stained with Evans blue as described in Methods. Cellular uptake of Evans blue was  
663 quantified by spectrophotometry. Values represent means  $\pm$  standard deviation (SD) (n=10 calli) of  
664 three experiments.

665

666 **Fig. 7** Interaction of KNAT1 protein with the promoter region of *PRX17*. **(A)** Electrophoretic  
667 mobility shift assay (EMSA) for KNAT1 binding to the *PRX17* gene promoter. The probe,  
668 biotin-labeled DNA corresponding to the *PRX17* gene promoter region (-1732 to -1359) from the  
669 site of initiation of translation and with three potential KNAT1 binding sites (box1, box2 and  
670 box3), was incubated in the absence (lane 1) and in the presence (lanes 2-4) of recombinant  
671 full-length KNAT1 proteins (His-KNAT1). As competitor DNA, homologous 100- and 200-fold  
672 excess of unlabeled DNA fragment was added to the reaction mixtures, respectively. The black  
673 arrows indicate shift band. The white arrows indicate free probe (FP). **(B)** Effector and Reporter  
674 constructs used in the transient assays. *pro35S*, Promoter from the *35S* gene of cauliflower mosaic  
675 virus; GUS,  $\beta$ -glucuronidase. **(C)** Effect of KNAT1 on *PRX17* promoter activity in vivo.

676 *Nicotiana benthamiana* intact leaves were infiltrated with *Agrobacterium* strains carrying the  
677 reporter construct with or without effector constructs. *proPRX17::GUS*, without effector;  
678 *proPRX17::GUS+pro35S::KNAT1 CDS*, with effector. Transactivation activity was detected by  
679 GUS staining assay. **(D)** Chromatin Immunoprecipitation (ChIP) assay of the Col callus showed  
680 that KNAT1 bound to *PRX17* promoter *in vivo* by qRT-PCR. Immunoprecipitation was performed  
681 with anti-KNAT1 antibody (Anti-KNAT1) or without antibody (no Ab). Primers (F+R) used in  
682 ChIP assay as shown in (A). Values represent means  $\pm$  standard deviation (SD) (n= 3).

683

684 **Fig.8** WRKY6 could together with BP and ER in regulating isoenzyme PRX17 activity in  
685 Arabidopsis callus. **(A)** RT-PCR analysis of *WRKY6* and *WRKY15* expression in the *er-105* and Col,  
686 respectively. *APT1* was used for the control. Total RNA samples from 14-day subculture old callus  
687 were isolated. **(B)** Relative transcript abundance changes of *WRKY6* gene in developing callus were  
688 detected using qRT-PCR. Callus were generated from root explants, and then inoculated on the new  
689 medium for 3, 6, 9 and 12 days. Values represent means  $\pm$  standard deviation (SD) (n= 3). **(C)**  
690 Analysis of peroxidase isoenzymes in callus of indicated samples by PAGE (50 $\mu$ g proteins/lane).  
691 Noted that the lost band (asterisks indicate) of PRX17 isoenzyme in *bp-5 wrky6*, like that in *bp-5*  
692 *er-105* callus (arrow indicates).

693

694 **Fig. 9** Interaction of WRKY6 protein with the promoter region of *PRX17*. **(A)** Electrophoretic  
695 mobility shift assay (EMSA) for WRKY6 binding to the *PRX17* gene promoter. The probe,  
696 biotin-labeled DNA corresponding to the *PRX17* gene promoter region (-1141 to -981) from the  
697 site of initiation of translation and two WRKY6 binding sites (box 4 and box 5), was incubated in  
698 the absence (lane 1) and in the presence (lanes 2-4) of recombinant full-length WRKY6 proteins.  
699 As competitor DNA, homologous 100- and 200-fold excess of unlabeled DNA fragment was  
700 added to the reaction mixtures, respectively. The black arrows indicate shift band. The white  
701 arrows indicate free probe (FP). **(B)** Effector and Reporter constructs used in the transient assays.  
702 *pro35S*, Promoter from the 35S gene of cauliflower mosaic virus; GUS,  $\beta$ -glucuronidase. **(C)**  
703 Effect of WRKY6 on *PRX17* promoter activity *in vivo*. *Nicotiana benthamiana* intact leaves were  
704 infiltrated with *Agrobacterium* strains carrying the reporter construct with or without effector



705 constructs. *proPRX17::GUS*, without effector; *proPRX17:: GUS+pro35S::WRKY6 CDS*, with  
706 effector. Transactivation activity was detected by GUS staining assay.

707

708

709

710

**Figure 1**

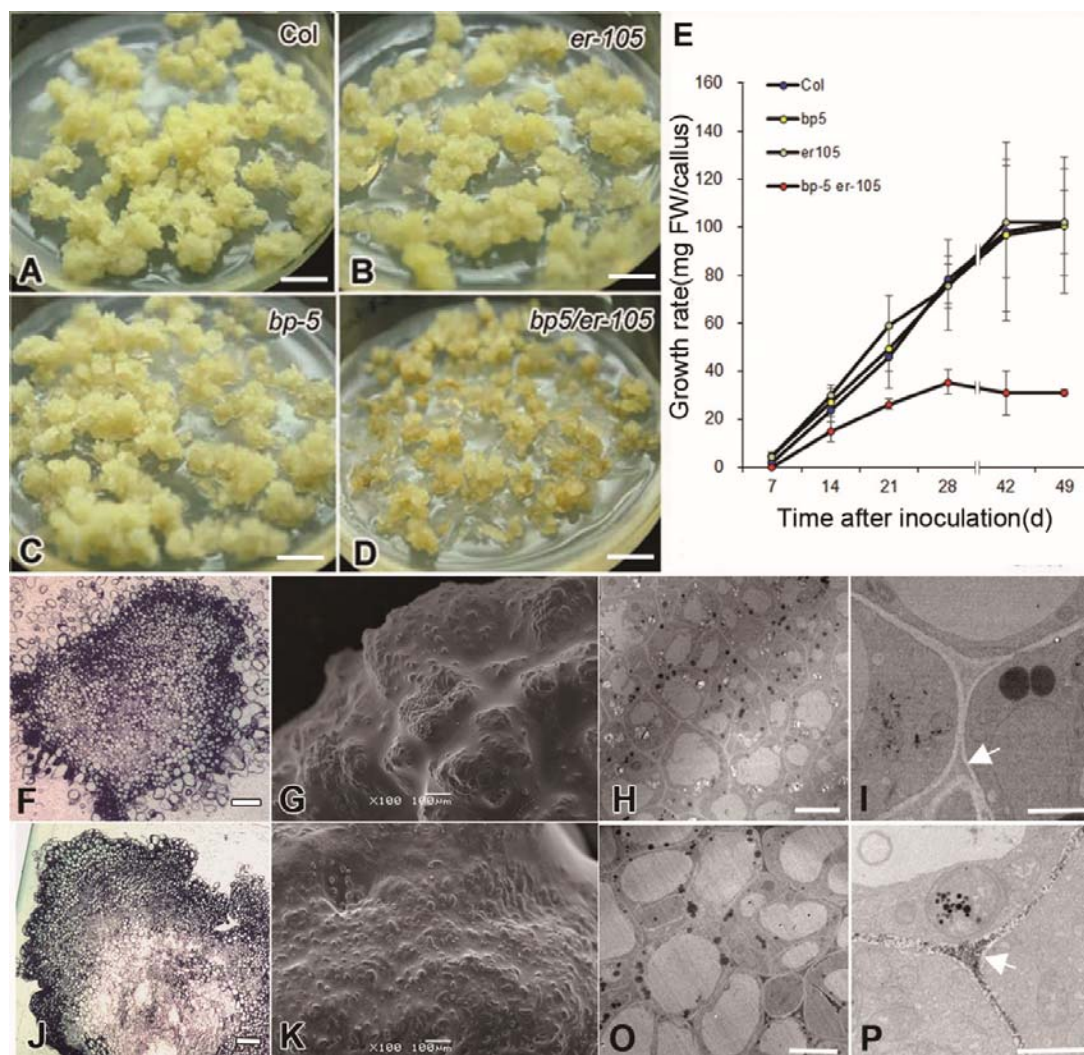

**Fig.1** BP and ER genes implicate in callus growth and browning.

(A-D) Callus of wild-type Col (A), single mutant *er-105*(B) and *bp5* (C) and double mutant *bp5 er-105* (D) after 3 weeks cultured on MS medium. Note that double mutant *bp5 er-105* callus appears smaller and oxidative browning (D). Scale bars, 10 mm.

(E) The growth rate of culture cells among the double mutant (*bp-5 er-105*), single mutant (*er-105* and *bp-5*) and Col. Error bars indicate the Standard deviation of the mean for three replications ( $n \geq 20$  calli for each time point).

(F and J) Resin sections of Col (F) and *bp5 er-105* (J) callus. Scale bars, 100 $\mu$ m.

(G and K) Scanning electron microscopy images of Col (G) and *bp5er-105* (K) callus. Scale bars, 100 $\mu$ m.

(H and O) Electron micrographs of sections of Col (H) and *bp5 er-105* (O) callus, which was stained by 10 mM cerium chloride ( $\text{CeCl}_3$ ) to compare the localized  $\text{H}_2\text{O}_2$  in cells between Col (H) and *bp5 er-105* (O) calli. Twenty calli from each genotype was collected for analysis of resin sections and electron microscopy. Scale bars, 20 $\mu$ m. (I) and (P) are enlarged from (H) and (O), respectively. Arrows point that the deposits are formed throughout cell wall of *bp5 er-105* callus cells, but less in cell wall of Col callus cells. Scale bars, 2 $\mu$ m.

**Figure 2**

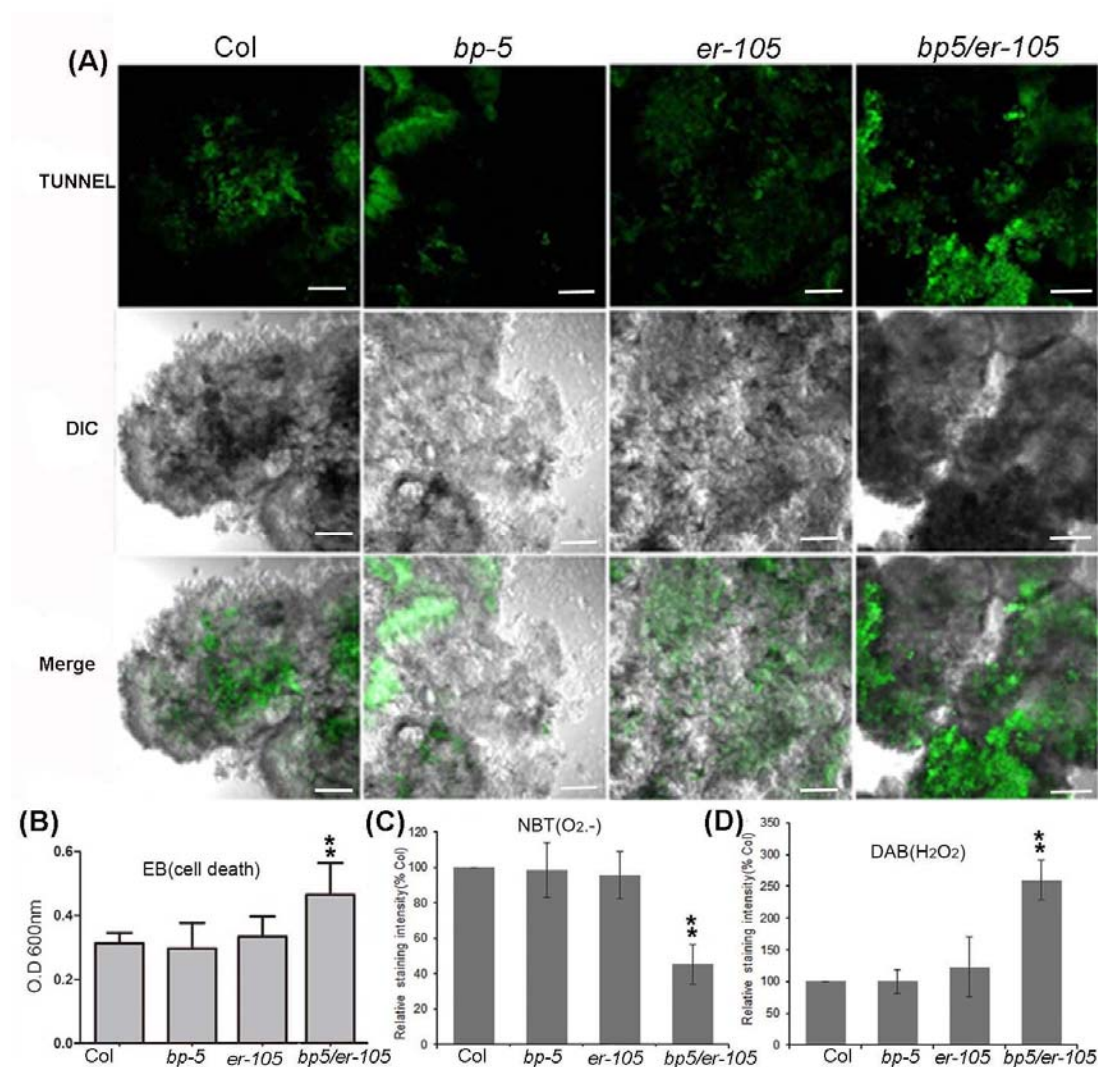

**Fig. 2** Comparison of cell death and endogenous O<sub>2</sub><sup>-</sup> and H<sub>2</sub>O<sub>2</sub> content in callus of *bp-5 er-105* with Col, *bp-5* and *er-105*.

(A) Typical TUNEL assay fluorescence microscopy images of the 21-day calli and their phase-contrast microscopy (DIC) images. Scale bars, 200μm.

(B) Evaluation of cell death in 21-day calli of Col, single mutants (*er-105* and *bp-5*) and double mutant (*bp-5 er-105*). The callus was stained with Evans blue (EB) as described in Methods. Cellular uptake of Evans blue was quantified by spectrophotometry at OD<sub>600</sub> nm. Values represent means ± standard deviation (SD) (n=10; student's t-test \*\*p < 0.001).

(C and D) Quantification of nitroblue tetrazolium (NBT) and diaminobenzidine oxide (DAB) staining intensity of Col, *bp5*, *er105* and *bp5 er105*, respectively. The staining intensity of Col is given as 100%, of which the staining intensity of mutants was compared, respectively. Values represent means ± standard deviation (SD), (n=20, student's t-test \*\*p < 0.001).

Figure 3

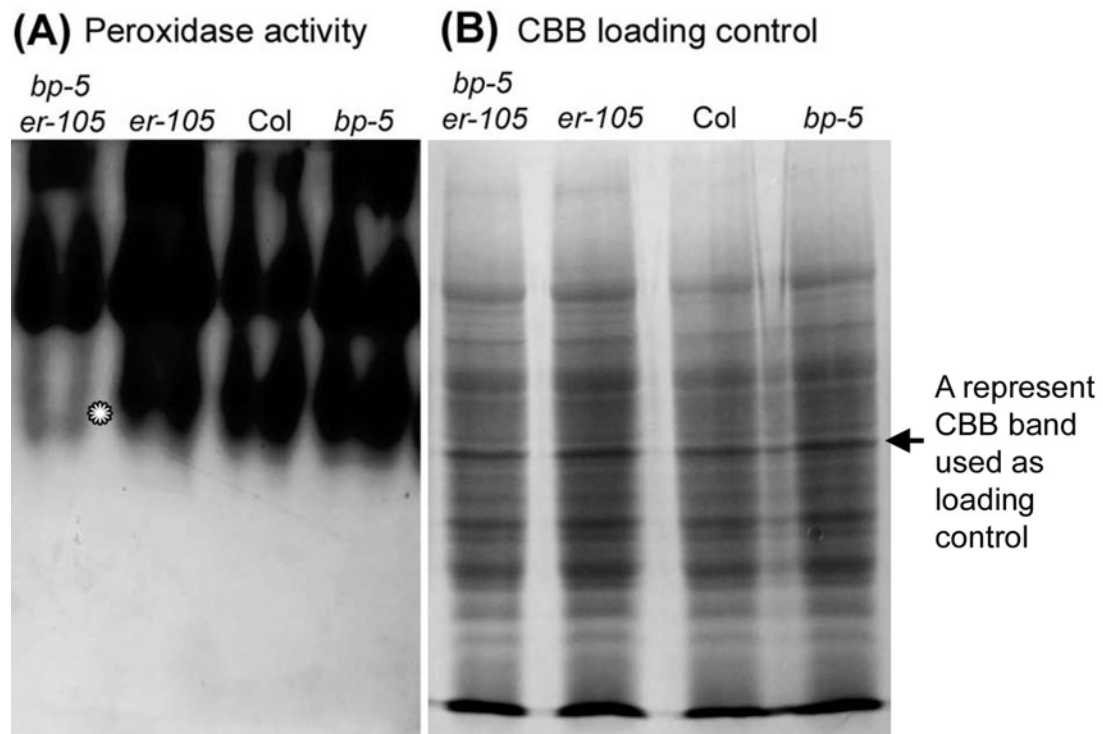

**Fig. 3** Isoenzyme analysis of peroxidases in developing callus of *bp-5 er-105*, *bp-5*, *er-105* and Col.

(A) Native PAGE gels stained for peroxidase activity. Note that a band (asterisk indicating) in double mutant *bp-5 er-105* callus was weaker significantly in comparison with that of *bp-5*, *er-105* and Col callus, respectively.

(B) Protein stained with Coomassie Brilliant Blue (CBB) was used as loading control.

**Figure 4**

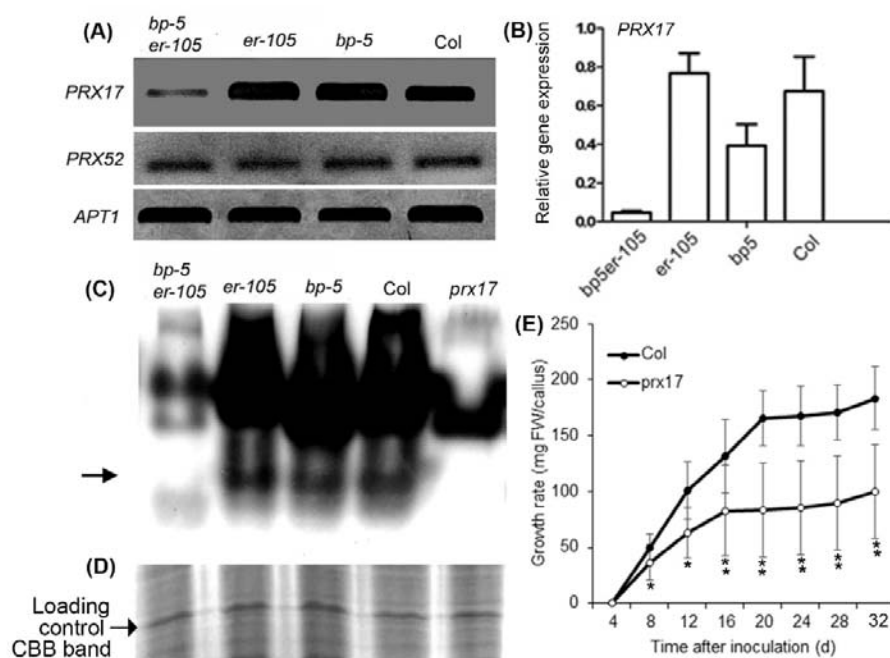

**Fig. 4** The absence of a peroxidase isoenzyme band of *bp-5 er-105* double mutant calli is consistent with that of *prx17* mutant calli.

(A) The expression analysis of *PRX17* and *PRX52* genes in callus of different genotypes by RT-PCR. Note that expression of *PRX17* gene was apparently down-regulated in *bp-5 er-105* double mutant in comparison with that in *er-105*, *bp-5* and Col callus, respectively. Total RNA samples were extracted from callus grown on a new medium for 14 days after subcultured.

(B) qRT-PCR analysis of *PRX17* transcription levels in *bp-5er-105* in comparison with that in *er-105*, *bp-5* and Col calli, respectively. Values represent means  $\pm$  standard deviation (SD) ( $n=3$ ) and results were consistent in at least three biological replicates.

(C) Isoenzyme analysis of peroxidases in *bp-5 er-105*, *er-105*, *bp-5*, Col and *prx17* mutant callus by PAGE (50  $\mu$ g proteins/lane). Note that a band (arrows point) is absent in both *bp-5 er-105* and *prx17* in comparison with that in *er-105*, *bp-5* and Col, respectively.

(D) A represent band in SDS-PAGE visualized by staining with Coomassie brilliant blue (CBB) was used as loading control.

(E) Growth rate of *prx17* culture cells in comparison with that of Col. Error bars indicate the Standard deviation of the mean for three replications (n=16 calli for each time point; \*p < 0.05, \*\*p < 0.001, student's t test).

**Figure 5**

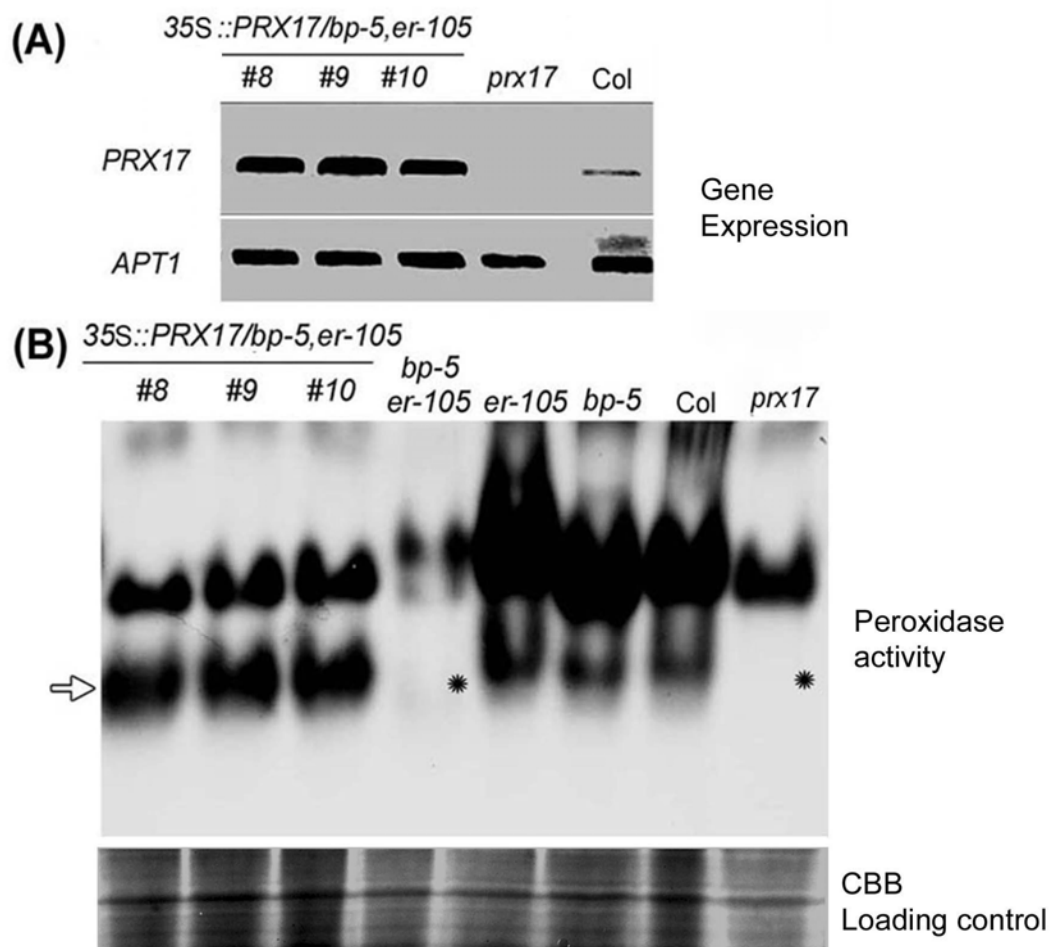

**Fig. 5** Substitution of *PRX17* promoter with 35S promoter in *bp-5 er-105* double mutant could rescue the loss band of the peroxidase isoenzyme in the native PAEG gel.

(A) RT-PCR analysis of *PRX17* expression in *35S::PRX17/bp-5 er-105* transgenic lines(*bp-5 er-105* background). Total RNA samples were isolated from 14-day -old subculture callus.

(B) Analysis of peroxidase isoenzymes in callus of *35S::PRX17/bp-5,er-105* transgenic line and the indicated mutants by PAGE (50µg proteins/lane). Noted that the lost band (asterisks indicate) of peroxidase isoenzymes in *bp-5 er-105* and *prx17* callus was rescued in the *35S::PRX17/bp-5 er-105* transgenic lines (e.g. line #8, #9 and #10) (arrow indicates). A represent band in

SDS-PAGE visualized by staining with Coomassie brilliant blue (CBB) was used as loading control.

**Figure 6**

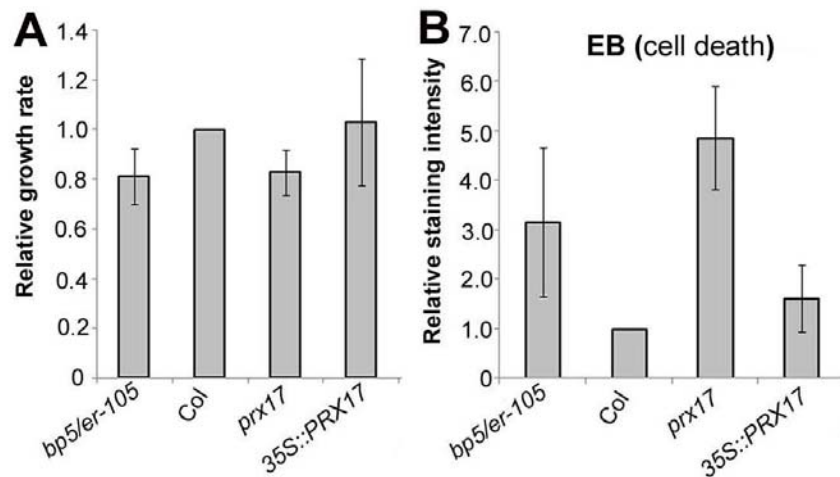

**Fig. 6** The growth rate of *prx17* mutant callus and *35S::PRX17* callus in comparison with that of *bp-5 er105* double mutant callus and wild-type Col callus, respectively.

**(A)** Comparison of growth rate (expressed as an increase in callus fresh weight) of callus cultures derived from *bp5 er-105*, Col, *prx17*, *35S::PRX17* root explants. 0.1g fresh weight callus of each indicating genotype was inoculated on the new CIM medium for 8 days and then measured the fresh weight. The increase in fresh weight of Col is given as 1.0, of which other mutants were compared, respectively. Values represent means  $\pm$  standard deviation (SD) (n=15~20).

**(B)** Evaluation of cell death by Evans blue (EB) staining. Callus inoculated with new medium for 2 weeks was stained with Evans blue as described in Methods. Cellular uptake of Evans blue was quantified by spectrophotometry. Values represent means  $\pm$  standard deviation (SD) (n=10 calli) of three experiments.



**Figure 7**

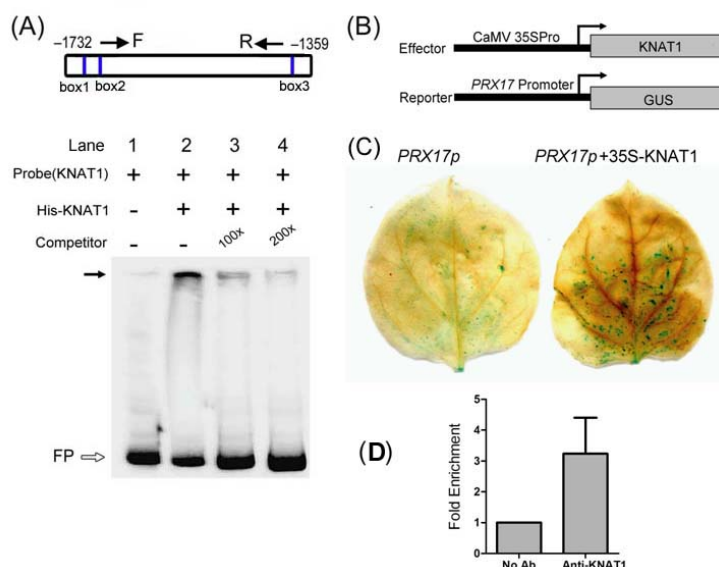

**Fig. 7** Interaction of KNAT1 protein with the promoter region of *PRX17*.

**(A)** Electrophoretic mobility shift assay (EMSA) for KNAT1 binding to the *PRX17* gene promoter.

The probe, biotin-labeled DNA corresponding to the *PRX17* gene promoter region (-1732 to -1359) from the site of initiation of translation and with three potential KNAT1 binding sites (box1, box2 and box3), was incubated in the absence (lane 1) and in the presence (lanes 2-4) of recombinant full-length KNAT1 proteins (His-KNAT1). As competitor DNA, homologous 100- and 200-fold excess of unlabeled DNA fragment was added to the reaction mixtures, respectively. The black arrows indicate shift band. The white arrows indicate free probe (FP).

**(B)** Effector and Reporter constructs used in the transient assays. *pro35S*, Promoter from the 35S gene of cauliflower mosaic virus; GUS,  $\beta$ -glucuronidase.

**(C)** Effect of KNAT1 on *PRX17* promoter activity in vivo. *Nicotiana benthamiana* intact leaves were infiltrated with *Agrobacterium* strains carrying the reporter construct with or without effector constructs. *proPRX17::GUS*, without effector; *proPRX17::GUS+pro35S::KNAT1 CDS*, with effector. Transactivation activity was detected by GUS staining assay.

**(D)** Chromatin Immunoprecipitation (ChIP) assay of the Col callus showed that KNAT1 bound to *PRX17* promoter in vivo by qRT-PCR. Immunoprecipitation was performed with anti-KNAT1 antibody (Anti-KNAT1) or without antibody (no Ab). Primers (F+R) used in ChIP assay as shown in (A). Values represent means  $\pm$  standard deviation (SD) (n= 3).

**Figure 8**

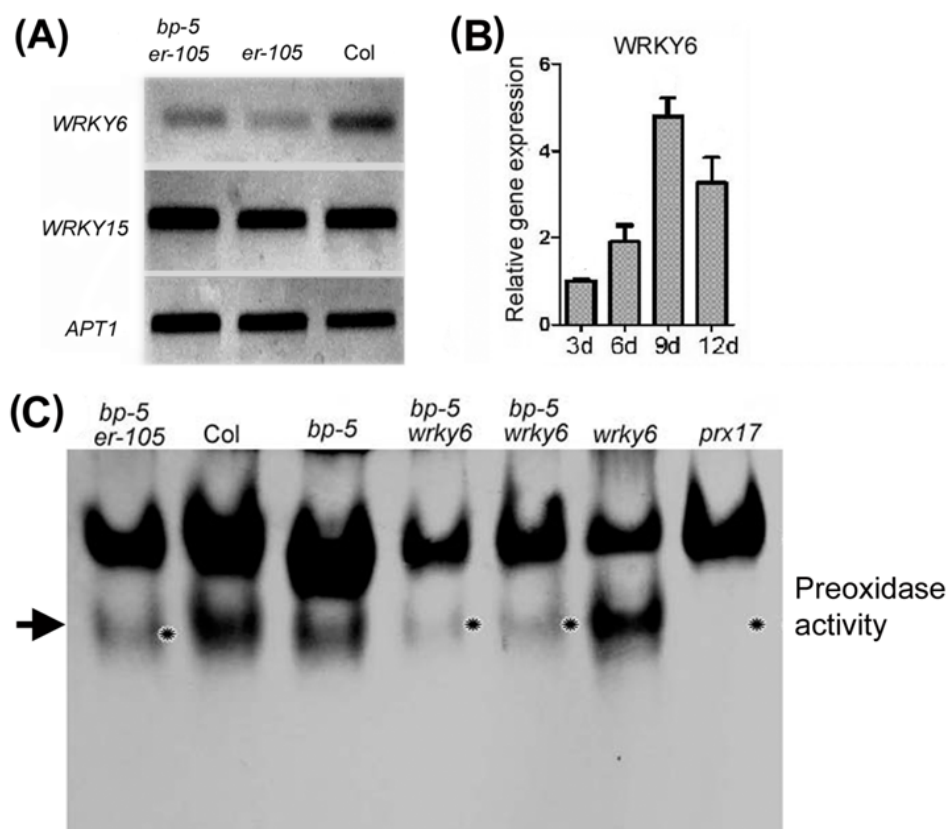

**Fig.8** WRKY6 could together with BP and ER in regulating isoenzyme PRX17 activity in Arabidopsis callus.

(A) RT-PCR analysis of *WRKY6* and *WRKY15* expression in the *er-105* and Col, respectively. *APT1* was used for the control. Total RNA samples from 14-day subculture old callus were isolated.

(B) Relative transcript abundance changes of *WRKY6* gene in developing callus were detected using qRT-PCR. Callus were generated from root explants, and then inoculated on the new medium for 3, 6, 9 and 12 days. Values represent means  $\pm$  standard deviation (SD) (n= 3).

(C) Analysis of peroxidase isoenzymes in callus of indicated samples by PAGE (50 $\mu$ g proteins/lane). Noted that the lost band (asterisks indicate) of PRX17 isoenzyme in *bp-5 wrky6*, like that in *bp-5 er-105* callus (arrow indicates).

**Figure 9**

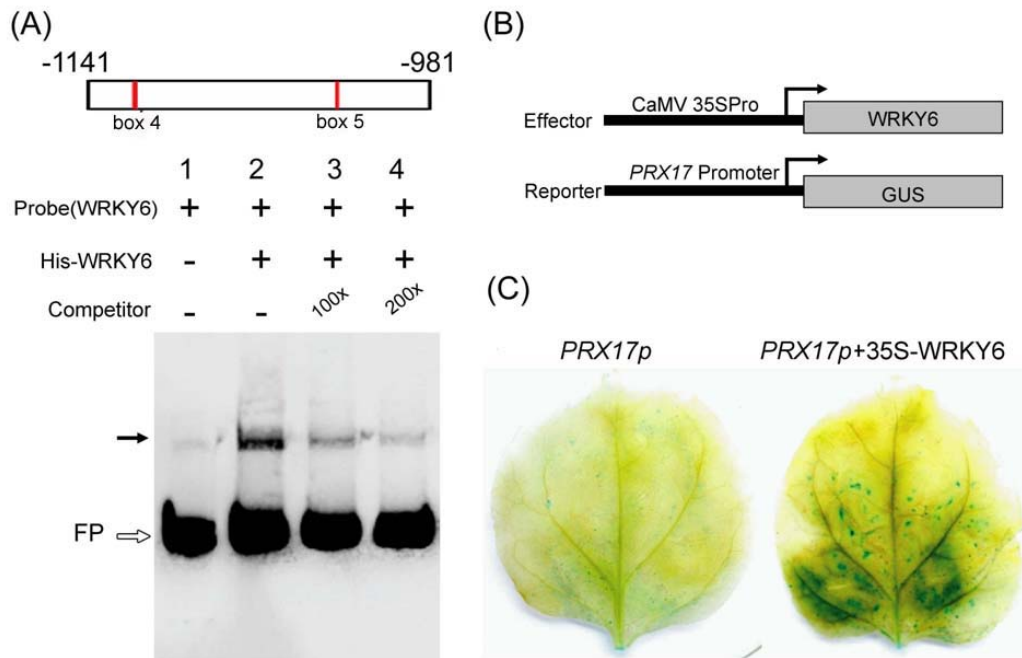

**Fig. 9** Interaction of WRKY6 protein with the promoter region of *PRX17*.

(A) Electrophoretic mobility shift assay (EMSA) for WRKY6 binding to the *PRX17* gene promoter. The probe, biotin-labeled DNA corresponding to the *PRX17* gene promoter region (-1141 to -981) from the site of initiation of translation and two WRKY6 binding sites (box 4 and box 5), was incubated in the absence (lane 1) and in the presence (lanes 2-4) of recombinant full-length WRKY6 proteins. As competitor DNA, homologous 100- and 200-fold excess of unlabeled DNA fragment was added to the reaction mixtures, respectively. The black arrows indicate shift band. The white arrows indicate free probe (FP).

(B) Effector and Reporter constructs used in the transient assays. *pro35S*, Promoter from the 35S gene of cauliflower mosaic virus; GUS,  $\beta$ -glucuronidase.

(C) Effect of WRKY6 on *PRX17* promoter activity in vivo. *Nicotiana benthamiana* intact leaves were infiltrated with *Agrobacterium* strains carrying the reporter construct with or without effector constructs. *proPRX17::GUS*, without effector; *proPRX17::GUS+pro35S::WRKY6 CDS*, with effector. Transactivation activity was detected by GUS staining assay.
